# Supplementary material for: Daily life participation in childhood chronic disease: a qualitative study on the child’s and parent’s perspective
Source: PubMed Central journal article supplement — BMJ Paediatr Open. 2021 May 18;5(1):e001057. doi: 10.1136/bmjpo-2021-001057 (PMC8137215; doi:10.1136/bmjpo-2021-001057), 2021-05-18
Supplement: bmjpo-2021-001057.draft_revisions.pdf [file bmjpo-2021-001057.draft_revisions.pdf]

# BMJ Paediatrics Open

BMJ Paediatrics Open is committed to open peer review. As part of this commitment we make the peer review history of every article we publish publicly available.

When an article is published we post the peer reviewers' comments and the authors' responses online. We also post the versions of the paper that were used during peer review. These are the versions that the peer review comments apply to.

The versions of the paper that follow are the versions that were submitted during the peer review process. They are not the versions of record or the final published versions. They should not be cited or distributed as the published version of this manuscript.

BMJ Paediatrics Open is an open access journal and the full, final, typeset and author-corrected version of record of the manuscript is available on our site with no access controls, subscription charges or pay-per-view fees (<http://bmjpaedsopen.bmj.com>).

If you have any questions on BMJ Paediatrics Open's open peer review process please email [info.bmjpo@bmj.com](mailto:info.bmjpo@bmj.com)

# BMJ Paediatrics Open

## Daily life participation in childhood chronic disease: two perspectives

|                               |                                                                                                                                                                                                                                                                                                                                                                                                                                                                                                                                                                                                                                                                                                                                                                                                                                                                                                                                                                                                                                                                                                 |
|-------------------------------|-------------------------------------------------------------------------------------------------------------------------------------------------------------------------------------------------------------------------------------------------------------------------------------------------------------------------------------------------------------------------------------------------------------------------------------------------------------------------------------------------------------------------------------------------------------------------------------------------------------------------------------------------------------------------------------------------------------------------------------------------------------------------------------------------------------------------------------------------------------------------------------------------------------------------------------------------------------------------------------------------------------------------------------------------------------------------------------------------|
| Journal:                      | <i>BMJ Paediatrics Open</i>                                                                                                                                                                                                                                                                                                                                                                                                                                                                                                                                                                                                                                                                                                                                                                                                                                                                                                                                                                                                                                                                     |
| Manuscript ID                 | bmjpo-2021-001057                                                                                                                                                                                                                                                                                                                                                                                                                                                                                                                                                                                                                                                                                                                                                                                                                                                                                                                                                                                                                                                                               |
| Article Type:                 | Original research                                                                                                                                                                                                                                                                                                                                                                                                                                                                                                                                                                                                                                                                                                                                                                                                                                                                                                                                                                                                                                                                               |
| Date Submitted by the Author: | 11-Feb-2021                                                                                                                                                                                                                                                                                                                                                                                                                                                                                                                                                                                                                                                                                                                                                                                                                                                                                                                                                                                                                                                                                     |
| Complete List of Authors:     | Nap-van der Vlist, Merel; Wilhelmina Children's Hospital, University Medical Center Utrecht, Paediatrics<br>Berkelbach van der Sprenkel, Emma; Wilhelmina Children's Hospital, University Medical Center Utrecht, Paediatrics<br>Nijhof, Linde; Wilhelmina Children's Hospital, University Medical Center Utrecht, Paediatrics<br>Grootenhuis, Martha; Princess Máxima Center for Paediatric Oncology, Psycho-oncology<br>van der Ent, Kors; University Medical Center Utrecht, Cystic Fibrosis Center and Department of Pediatric Respiratory Medicine<br>Swart, Joost; Wilhelmina Children's Hospital, University Medical Center Utrecht, Paediatric Rheumatology<br>van Royen-Kerkhof, A; Wilhelmina Children's Hospital, University Medical Center Utrecht, Pediatrics<br>van Grotel, Martine; Princess Máxima Center for Paediatric Oncology, Oncology<br>van de Putte, Elise M.; Wilhelmina Children's Hospital, General Pediatrics<br>Nijhof, Sanne L.; Wilhelmina Children's Hospital University Medical Centre<br>Kars, Marijke C.; Julius Center for Health Sciences and Primary Care |
| Keywords:                     | Cystic Fibrosis, Qualitative research, Rheumatology                                                                                                                                                                                                                                                                                                                                                                                                                                                                                                                                                                                                                                                                                                                                                                                                                                                                                                                                                                                                                                             |
|                               |                                                                                                                                                                                                                                                                                                                                                                                                                                                                                                                                                                                                                                                                                                                                                                                                                                                                                                                                                                                                                                                                                                 |

SCHOLARONE™  
Manuscripts

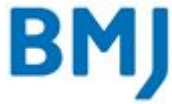

I, the Submitting Author has the right to grant and does grant on behalf of all authors of the Work (as defined in the below author licence), an exclusive licence and/or a non-exclusive licence for contributions from authors who are: i) UK Crown employees; ii) where BMJ has agreed a CC-BY licence shall apply, and/or iii) in accordance with the terms applicable for US Federal Government officers or employees acting as part of their official duties; on a worldwide, perpetual, irrevocable, royalty-free basis to BMJ Publishing Group Ltd ("BMJ") its licensees and where the relevant Journal is co-owned by BMJ to the co-owners of the Journal, to publish the Work in this journal and any other BMJ products and to exploit all rights, as set out in our [licence](#).

The Submitting Author accepts and understands that any supply made under these terms is made by BMJ to the Submitting Author unless you are acting as an employee on behalf of your employer or a postgraduate student of an affiliated institution which is paying any applicable article publishing charge ("APC") for Open Access articles. Where the Submitting Author wishes to make the Work available on an Open Access basis (and intends to pay the relevant APC), the terms of reuse of such Open Access shall be governed by a Creative Commons licence – details of these licences and which [Creative Commons](#) licence will apply to this Work are set out in our licence referred to above.

Other than as permitted in any relevant BMJ Author's Self Archiving Policies, I confirm this Work has not been accepted for publication elsewhere, is not being considered for publication elsewhere and does not duplicate material already published. I confirm all authors consent to publication of this Work and authorise the granting of this licence.

## Daily life participation in childhood chronic disease: two perspectives

Nap-van der Vlist MM<sup>a</sup>, Berkelbach van der Sprenkel EE<sup>a</sup>, Nijhof LN<sup>a</sup>, Grootenhuis MA<sup>b</sup>, van der Ent CK<sup>c</sup>, Swart JF<sup>d</sup>, van Royen-Kerkhof A<sup>d</sup>, van Grotel M<sup>b</sup>, van de Putte EM<sup>a</sup>, Nijhof SL<sup>a</sup>, Kars MC<sup>e</sup>.

<sup>a</sup> Department of Paediatrics, Wilhelmina Children's Hospital, University Medical Centre Utrecht, Utrecht University, Utrecht, the Netherlands

<sup>b</sup> Princess Máxima Centre for Paediatric Oncology, Utrecht, the Netherlands

<sup>c</sup> Department of Paediatric Pulmonology, Wilhelmina Children's Hospital, University Medical Centre Utrecht, Utrecht University, Utrecht, the Netherlands

<sup>d</sup> Department of Paediatric Rheumatology/Immunology, Wilhelmina Children's Hospital, University Medical Centre Utrecht, Utrecht University, Utrecht, The Netherlands

<sup>e</sup> Julius Centre for Health Sciences and Primary Care, University Medical Centre Utrecht, Utrecht University, Utrecht, the Netherlands

### CORRESPONDING AUTHOR:

Merel M. Nap-van der Vlist, MSc, Department of Paediatrics, Wilhelmina Children's Hospital.

Postal address: HP KE.04.133.1, PO Box 85090, 3508 AB, Utrecht, The Netherlands.

E-mail: m.m.vandervlist-3@umcutrecht.nl

Phone: +31 88 756 3100 Fax: +31 88 755 5349

No reprints.

**SHORT TITLE:** Daily life participation in children with chronic disease

**FINANCIAL DISCLOSURE STATEMENT:** The authors have no financial relationships relevant to this article to disclose.

**FUNDING:** None

**POTENTIAL CONFLICTS OF INTEREST:** The authors have no conflicts of interest relevant to this article to disclose.

**KEY WORDS:** qualitative study, participation, children, chronic disease

**ABBREVIATIONS:** juvenile idiopathic arthritis (JIA); Paediatric Quality of Life Inventory Multidimensional Fatigue Scale (PedsQL MFS); visual analogue scale (VAS).

## ABSTRACT

**Objective:** To understand how a child with a stable chronic disease and his/her parents shape his/her daily life participation, we assessed: 1) the parents' goals regarding the child's daily life participation, 2) parental strategies regarding the child's participation, and 3) how children and their parents interrelate when their goals regarding participation are not aligned.

**Methods:** This was a qualitative study design using a general inductive approach. Families of children 8-19 years with a stable chronic disease (cystic fibrosis, autoimmune disease, or post-cancer treatment) were recruited from the PROactive study. Simultaneous in-depth interviews were conducted separately with the child and parent(s). Analyses included constant comparison, coding, and categorization.

**Results:** Thirty-one of the 57 invited families (54%) participated. We found that parents predominantly focus on safeguarding their child's well-being, using participation as a means to achieve well-being. Moreover, parents used different strategies to either support participation consistent with the child's healthy peers or support participation with a focus on physical well-being. The degree of friction between parents and their child was based on the level of agreement on who takes the lead regarding the child's participation.

**Conclusions:** Interestingly, parents described participation as primarily a means to achieve the child's well-being, whereas children described participation as more of a goal in itself. Understanding the child's and parent's perspective can help children, parents, and healthcare professionals start a dialogue on participation and establish mutual goals. This may help parents and children find ways to interrelate while allowing the child to develop his/her autonomy.

## INTRODUCTION

Children with a chronic disease are often unable to achieve the same level of participation in daily life as healthy children.<sup>1</sup> A chronic disease can have a major impact on many aspects of life, including the physical, mental, and social well-being of both the child and his/her family.<sup>2-4</sup> As an increasing number of children grow up with a chronic disease, the consequences of their disease with respect to their daily life participation become increasingly evident.<sup>1</sup> We previously described the child's perspective on "full participation" among children with a chronic disease.<sup>5</sup> We found that these children feel that participation encompasses more than engaging in activities; indeed, the children described having a sense of belonging, the ability to affect social interactions, and the capacity to keep up with healthy peers as key elements.<sup>5-9</sup> Additionally, an important consideration is that the child's parents also play an essential role in driving the child's participation.<sup>10</sup>

Parents form their child's primary social network and can have a major impact on their child's daily life participation, especially because the presence of a chronic disease can affect the parent-child relationship and increases the child's dependency.<sup>11,12</sup> It is crucial to understand how parents perceive their child's daily life participation, as well as their goals regarding their child's participation.<sup>13</sup> In addition to the child's perspective, this can help lay the foundation for establishing mutual goals and a patient-centred approach regarding the child's participation.<sup>11,14,15</sup> Paired qualitative analyses in this field are scarce, but provide important insights into the child-parent relationship and the role of their collaboration in shaping the child's daily life.<sup>16-18</sup> The aim of this study was to determine: 1) the parent's goal regarding the daily life participation of their child with a chronic disease, 2) parental strategies regarding the child's participation, and 3) how the child and his/her parents interrelate when their goals regarding the child's participation are not aligned.

## METHODS

We used an explorative qualitative interview study design to examine parents' view regarding their child's participation, as well as how the child and his/her parents interrelate regarding the child's participation. We used a general inductive approach and the Qualitative Analysis Guide of Leuven method proposed by Dierckx de Casterlé et al.<sup>19</sup> This study builds upon our recent analysis of the transcripts from interviews with children with a chronic disease.<sup>5</sup>

Patient organisations were involved in setting the agenda and the priorities for this research. Children and their parents were involved in the conduct of this study, as this qualitative method is specifically designed to stress the patient's and parent's perspective. Patient organisations and societal partners are involved in the dissemination of our research.

Families were purposefully recruited in accordance with qualitative sampling strategies<sup>20</sup> from the PROactive study cohort, which consists of children with cystic fibrosis, an autoimmune disease, or children within one year post-cancer treatment at the Wilhelmina Children's Hospital and the Princess Máxima Centre for Paediatric Oncology in the Netherlands. Children who were interviewed were 8-19 years of age, in a stable phase of their disease, and able to verbally communicate in an interview about their participation (both determined by their treating physician). Maximum variation was sought in the children's age, sex, school absences, and fatigue and pain levels.<sup>20</sup> In the PROactive cohort, fatigue was assessed using the Multidimensional Fatigue Scale of the Paediatric Quality of Life Inventory (PedsQL MFS),<sup>21</sup> school absences over the previous 2 weeks and 6 months were reported, and average pain experienced over the previous week was reported on a visual analogue scale (VAS).<sup>22</sup>

1  
2  
3 Families were approached by the child's treating physician. If they indicated that they were  
4 willing to participate, the child and his/her parent(s) were interviewed at the same time (in  
5 separate interviews) by trained interviewers using an in-depth semi-structured interview  
6 lasting 60-90 minutes.<sup>23</sup> We used separate interview guides covering the same topics for the  
7 children and parents, based on the published literature and the research team's expertise. The  
8 interview began with the following open-ended question. For parents this was: "What do you  
9 notice with respect to the impact that your child's disease has on his/her participation in daily  
10 life?" For children this was: "To what extent does your disease affect your daily life?" We  
11 then focused on the childrens' and parents' experiences and perspectives.  
12  
13  
14  
15  
16  
17  
18  
19  
20  
21  
22  
23  
24  
25

26 Data were analysed using two intertwined strategies, namely coding and theoretical thinking,  
27 while alternating between data collection and data analysis.<sup>19,24,25</sup> Our previous report focused  
28 on our analysis of the children's interviews.<sup>5</sup> Here, we first analysed all of the transcripts of  
29 the parents' interviews and then analysed the children's and parents' paired transcripts in  
30 order to determine how children and their parents interrelate when their participation goals are  
31 not aligned. Initial coding and theoretical thinking was performed by a core team of four  
32 researchers. We used researcher triangulation and constant comparisons in order to achieve a  
33 thorough understanding of the qualitative material.<sup>19,24</sup> The whole team, consisting of seven  
34 researchers from a variety of backgrounds, including paediatric nursing, medicine, and  
35 psychology, checked the findings and validated the results. Coding was achieved using the  
36 MAXQDA software program.<sup>26</sup>  
37  
38  
39  
40  
41  
42  
43  
44  
45  
46  
47  
48  
49  
50  
51  
52  
53

54 The Institutional Review Board determined that this study was exempt from the Medical  
55 Research Involving Human Subjects Act (16-797/C). Informed consent and/or assent were  
56 provided by all participating parents and/or their children.  
57  
58  
59  
60



## RESULTS

Of the 57 invited families, 31 (54%) participated. Reasons given for declining to participate included currently being involved in another study and the child finding it too burdensome to talk about his/her disease. Characteristics of the children and their parents are summarized in Table 1. We interviewed all 31 children individually, as well as 22 mothers, 1 father, and 8 parental couples. In four cases, the child's sibling(s) were present during the parental interview; in two of these cases, the siblings participated in the interview.

### *Parents reported two main approaches regarding their child's participation*

Parents reported that they predominantly focus on safeguarding their child's current and future well-being. Well-being was defined as their child feeling good/happy or having a sense of fulfilment. Several domains can contribute to the child's well-being; physical, social, spiritual and psychological well-being. Interestingly, we found that how parents react to their child with respect to his/her participation was not necessarily motivated by the disease specific factors; rather, they were motivated primarily by their perception of their child's well-being.

Participation was used as a means to accomplish well-being in these domains, but was not seen as a goal in itself. To increase their child's participation as a means to an end, parents predominantly used two approaches: 1) participation that matches the level of their child's healthy peers, and 2) participation with a focus on physical well-being. Although parents in our study sometimes switched between these two approaches to safeguard well-being, many had a preference for one.

When parents used the approach of promoting their child's participation to be consistent with healthy peers, their goal was for their child to be perceived by his/her peers as not different,

1  
2  
3 even though he/she was unable at times to perform the same activities. These parents  
4 attempted to treat their child similarly to his/her siblings and friends (e.g. they encouraged  
5 their child to join social activities, even when he/she did not feel well enough). Parents said  
6 that they chose this approach either because it aligned with their child's preferences, which  
7 supported his/her current psychological, spiritual (sense of fulfilment) and social well-being,  
8 or to help their child grow socially from a developmental perspective, which was expected to  
9 support his/her future well-being.  
10  
11  
12  
13  
14  
15  
16  
17  
18  
19  
20

21 On the other hand, when parents used the other approach – participation with a focus on  
22 physical well-being – they strive for their child to have as few symptoms as possible,  
23 investing in an optimal therapeutic regimen in order to control their child's disease.  
24 Consequently, their child's ability to participate at the same level as his/her healthy peers was  
25 replaced by other forms of participation that they considered less threatening to the child's  
26 physical well-being (for example, staying at home or participating online). They focused on  
27 their child having a good time, thus supporting the child's current and future well-being by  
28 focusing on minimizing his/her symptoms.  
29  
30  
31  
32  
33  
34  
35  
36  
37  
38  
39  
40  
41

42 Box 1. Example illustrating a mother using the two participation approaches.

43 The mother of a ten-year-old boy with cystic fibrosis described: *"It is difficult when he goes*  
44 *to a party or a disco that goes on a bit late. I want him to be able to join in, but for two days*  
45 *afterwards he is very bad-tempered and tired, and he complains of having a stomach ache."*

46  
47  
48  
49  
50  
51 With the child's well-being in mind, she can choose to let her son go to the party because she  
52 considers this beneficial to his current social, spiritual (sense of fulfilment) and psychological  
53 well-being, thereby meeting his desire to achieve full participation. This choice would be  
54 consistent with the approach of participation consistent with the child's peers. Alternative,  
55  
56  
57  
58  
59  
60

1  
2  
3 she can choose to not let her son go to the party because she believes the party would be  
4 dangerous to his physical well-being and that staying home will improve her son's social and  
5 emotional well-being in the near future. This choice would be consistent with the approach of  
6 participation based on the child's physical well-being, as it means that the child could  
7 participate later in a different activity and would experience fewer symptoms.  
8  
9  
10  
11  
12  
13  
14

15  
16  
17 Figure 1 illustrates how the child's well-being plays a role in how the child's parents shape  
18 his/her participation, including the strategies parents can use to support the two approaches  
19 discussed above; these strategies are described in more detail in Table 2. It is important to  
20 note that these various strategies require different amounts of parental investment, either  
21 personal, social or financial.  
22  
23  
24  
25  
26  
27  
28  
29  
30

31 ***How the parents and their child interrelate when their goals regarding participation are not***  
32 ***aligned***  
33

34  
35 Most children indicated that their goal was to achieve full participation. In contrast, most  
36 parents indicated that their goal was to optimize their child's current and future well-being,  
37 using participation as means to achieve that goal, not as goal in itself. Sometimes, achieving  
38 both full participation and optimal well-being was possible based on the child's and parent's  
39 perception. However, especially among children whose well-being was decreased and among  
40 older children, the parents' goals and the child's goals sometimes drifted apart.  
41  
42  
43  
44  
45  
46  
47  
48  
49  
50

51 When the parents' and child's goals drifted apart, we distinguish four ways in which parents  
52 and children interrelated to each other, based on who wants to take the lead regarding the  
53 child's participation (Table 3). It is important to note that both the child and the parents can  
54 change their viewpoint over time and depending on the situation.  
55  
56  
57  
58  
59  
60

1  
2  
3 We saw scenario one, parents taking the lead regarding the child's participation, primarily in  
4 families in which the child is relatively young. This scenario did not lead to considerable  
5 friction, as the parent made the final decisions regarding the child's participation, and the  
6 child followed their decisions. Scenario two, both the parents and the child want to take the  
7 lead, was mostly seen in older children. As children grow older, they search to increase their  
8 level of autonomy and are able to guide their own participation. In some cases, however, the  
9 parents – particularly parents with a child who is more limited by his/her disease – found it  
10 difficult to allow their child to guide his/her own participation. This can lead to conflict  
11 between parent and child. Parents noted that they were continuously having to find a balance  
12 between their child's growing autonomy and their own goals in safeguarding the child's well-  
13 being. In some cases (scenario 3), the parents wish that their child was more autonomous, but  
14 the child did not want to take on the challenge of guiding his/her own participation. In the last  
15 scenario (scenario 4), the child becomes more autonomous and the parents let him/her  
16 determine his/her own participation. The child essentially takes the lead, with the parents  
17 serving in a more advisory role. All scenarios are illustrated in text boxes.

18  
19  
20  
21  
22  
23  
24  
25  
26  
27  
28  
29  
30  
31  
32  
33  
34  
35  
36  
37  
38  
39  
40 Box 2. Example illustrating who takes the lead regarding the child's participation.

41  
42 A mother of an eleven-year-old girl with generalized morphea scleroderma discussed how  
43 she used to take the lead regarding her daughter's participation by trying to protect her and  
44 redirect her participation to keep her from exceeding her physical limitations. As her  
45 daughter grew older, she (the daughter) began to take charge of her participation herself and  
46 recognized the consequences of these choices on her well-being. Thus, her mother was more  
47 comfortable letting her daughter take the lead in determining her own participation. *"We've*  
48 *had times when we had to be really confrontational, where we said to E., 'You can't do it, so*  
49 *you aren't allowed to do it...' Back then, she used to get really angry about things and cry.*

1  
2  
3  
4  
5  
6  
7  
8  
9  
10  
11  
12  
13  
14  
15  
16  
17  
18  
19  
20  
21  
22  
23  
24  
25  
26  
27  
28  
29  
30  
31  
32  
33  
34  
35  
36  
37  
38  
39  
40  
41  
42  
43  
44  
45  
46  
47  
48  
49  
50  
51  
52  
53  
54  
55  
56  
57  
58  
59  
60

*She understands better now. Last year one of her classmates was having a party at a trampoline center, but E. said herself that she wasn't going to go. She said, 'I would really have to pay for it for three days afterwards; I wouldn't be able to walk for three days.' It's still the same now; when we go there, she really goes crazy for a while. Well that's fine, if she thinks she can do it. She knows she won't be able to walk the next day, but she does it anyway. Fine, it's her choice."*

Box 3. Example illustrating the scenario in which the parents take the lead.

The mother of an eight-year-old girl with mixed connective tissue disease described: *"Yes, she didn't need to make that decision. But that's me; I make a lot of decisions on her behalf. I don't know if this is a good thing or not, but both of us are very strict at home; we don't believe much in that 'yes, but' culture. I am perfectly willing to explain why I made a certain decision, but we do what I decide we will do."* The girl herself described it as follows: *"I sometimes want to do things, but then mommy says that it's probably better not to, because it will make me too tired."*

Box 4. Example illustrating a conflict arising when both the parents and the child want to take the lead.

The mother of a twelve-year-old girl with juvenile idiopathic arthritis (JIA) described: *"She oversteps her boundaries. She is confrontational; she will become confrontational if she doesn't want to do something or doesn't want to admit something."*

The girl herself described: *"Most of the time my mother asks if I took my medication... Sometimes I just say 'yes' even if I didn't take it; it's annoying."*

Box 5. Example illustrating the role of disclosure in the parent-child relationship with respect

1  
2  
3 to the child's participation.

4  
5 Some children stopped disclosing their limitations or symptoms to their parents (e.g. by not  
6  
7  
8  
9  
10  
11  
12  
13  
14  
15  
16  
17  
18  
19  
20  
21  
22  
23  
24  
25  
26  
27  
28  
29  
30  
31  
32  
33  
34  
35  
36  
37  
38  
39  
40  
41  
42  
43  
44  
45  
46  
47  
48  
49  
50  
51  
52  
53  
54  
55  
56  
57  
58  
59  
60  
telling the parents that they were in pain, so that their parents would not forbid them from  
participating), thereby reducing their parents' ability to direct them. The mother of a twelve-  
year-old girl which JIA describes: *"She doesn't want to be any different, and she wants to  
join in. So even if she's in pain she won't say so or give any indication that she's in pain or  
can't do something; she never says so."* In response, the parents often attempted to "read"  
how their child felt, believing their mission was to interpret their child's non-verbal signs in  
order to ascertain their child's true condition. One sixteen-year-old girl with JIA described:  
*"They sometimes ask me if I'm still not feeling well. Every day I just say yes. Well, maybe not  
every day, you know what I mean; they ask about it sometimes, but I wouldn't tell them  
myself."*

33 Box 6. Example illustrating the way in which the child's disease can interfere with his/her  
34  
35 autonomy.

36  
37  
38  
39  
40  
41  
42  
43  
44  
45  
46  
47  
48  
49  
50  
51  
52  
53  
54  
55  
56  
57  
58  
59  
60  
One mother of a fourteen-year-old boy with common variable immunodeficiency disorder  
described: *"Because someone is ill, you start trying to fix things, which means you are  
actually not accepting someone for who they are. He can't accept what he is, even though he  
wants nothing more than to be accepted for what he is. You very quickly notice that due to  
the disease the child's 'ownership' of themselves is nipped in the bud, certainly when the  
child is so young. Ownership of the body, but also of decisions and thoughts; that's what's  
nipped in the bud, even though our society continually expects everyone to participate and be  
independent, and to own themselves. So, on one hand you take a lot away from the child, and  
on the other hand you force independence on them and expect them to undertake things. But  
when it comes to them wanting to make an autonomous decision about something like getting*

1  
2  
3 *an injection, that's different; whether they like it or not, they have to get it. It is horrible*  
4  
5 *having to force a child to do awful things, both physically and mentally."*  
6  
7

8  
9  
10 Box 7. Example in which neither the parents nor their child want to take the lead.  
11

12 One mother of a 15-year-old boy with cystic fibrosis described her desire for her son to  
13 become more autonomous in terms of regulating his own therapeutic regimen and inviting  
14 friends over; however, when she saw that her son was not going to step up and take the lead  
15 and therefore jeopardized his well-being, she took back the lead: *"I could tell him I wasn't*  
16 *going to do it and back off. But then I know that it would all go wrong. I just think to myself,*  
17 *'Oh well, as long as he is at home and I am still able to do it for him.'"*  
18  
19  
20  
21  
22  
23  
24  
25  
26  
27

28  
29 Box 8. Example of a child who takes the lead regarding his/her participation.  
30

31 The mother of a 10-year-old girl with JIA: *"I'm not the one who should forbid it. For*  
32 *example, she tried dancing for six months, and it didn't go well at all. I could have forbidden*  
33 *it, but thought it was better that she found out for herself. Now she really likes free running,*  
34 *even though she can't keep up. But the kids there know that, and she does what she can.*  
35 *She's getting exercise, and she enjoys being part of a group. I can see she is benefitting from*  
36 *it and that it's going well. But do I think it's sensible? No, I don't."*  
37  
38  
39  
40  
41  
42  
43

44 Her daughter: *"We often play 'show-jumping', where you put down blocks, lay a hockey stick*  
45 *across them, and then jump over the stick. Even though it isn't very easy, I still join in and*  
46 *play it a lot."*  
47  
48  
49  
50  
51  
52  
53  
54  
55  
56  
57  
58  
59  
60

## DISCUSSION

We aimed to describe the parents' and child's perspective on the daily life participation among chronically ill children. We found that parents predominantly focus on safeguarding their child's well-being, using participation as a means to achieve well-being. We identified two approaches that parents take: *i*) participation consistent with their child's healthy peers, and *ii*) participation with a focus on their child's physical well-being. We also found that parents use different strategies for supporting these approaches, and we found that friction can arise between parent and child when they felt different on who (i.e. parents or child) should take the lead regarding the child's participation.

A conceptual analysis based on the International Classification of Functioning, Disability and Health criteria describes participation as both a means and an end.<sup>27</sup> Interestingly, in our interviews parents described participation as primarily a means to achieve well-being, whereas children described participation as more of a goal in itself, as we previously reported.<sup>5</sup> This apparent discrepancy underscores the importance of establishing a dialogue regarding how participation should take place. Several aspects found in this study are in line with other major themes in qualitative studies among children with various chronic diseases and their parents. These include striving for normalcy or being more like the child's healthy peers,<sup>28-33</sup> and findings ways to manage the child's disease and symptoms, although the way in which parents and children managed this sometimes differed.<sup>9,16,18,29,30,32,34-36</sup>

These differences in viewpoint between parents and children can give rise to friction. The presence of a chronic disease can influence both the parent-child relationship and the child's path to autonomy, as it increases the child's dependency, particularly when additional care is needed and given that parents wish to protect their child.<sup>11-13,33</sup> Friction in the parent-child



1  
2  
3 relationship has also been reported in other qualitative studies among young people with  
4 chronic diseases, which describe parents who find it difficult to allow their child to make  
5 his/her own choices, as well as children who feel unable to fulfil their desire for  
6 independence.<sup>9,14,16,32</sup> Our finding that sometimes neither the parents nor the child want to  
7 take the lead is also consistent with several studies that found that young people can be  
8 hesitant to take the lead, as they feel safer with their parents.<sup>9,16,18</sup> Therefore, opening a  
9 dialogue to discuss the parent's and child's perspective on the child's participation may help  
10 children and parents better understand each other and may help them find ways to interrelate  
11 while giving the child more autonomy. Teaching healthcare professionals to start a dialogue  
12 with children and parents regarding their goals and preferences may be helpful in clinical  
13 practice.<sup>37</sup>

14  
15  
16  
17  
18  
19  
20  
21  
22  
23  
24  
25  
26  
27  
28  
29  
30  
31 A major strength of this study is our paired analysis of qualitative material in which the child  
32 and his/her parent(s) were interviewed separately but simultaneously. This approach provides  
33 important insights into the parents' and child's views regarding participation and how these  
34 views interrelate among various paediatric chronic diseases.<sup>5</sup> Finally, our analytical methods  
35 were designed to optimize both validity and reliability.<sup>20,25</sup> Saturation was reached with  
36 respect to the goals for participation and how the child and his/her parents interrelate,  
37 although some aspects of the parental strategies may not have been fully revealed.

38  
39  
40  
41  
42  
43  
44  
45  
46  
47  
48  
49 Despite these strengths, our study has limitations that warrant discussion, including the  
50 limitations described in our previous report such as the generalizability of our results, as we  
51 interviewed Caucasian families only. In addition, the parental interviews focused primarily on  
52 how their child viewed his/her participation and not necessarily how the parents defined the  
53 participation of the child, as our research design focused on the child.

1  
2  
3  
4  
5  
6 With respect to the daily life participation of a chronically ill child, healthcare professionals  
7  
8 should initiate a conversation regarding the parents' and child's goals, and the child's  
9  
10 autonomy as early as possible in order to observe and discuss changes over time.<sup>37</sup> For future  
11  
12 studies, interventions that teach healthcare professionals how to start a dialogue with children  
13  
14 and parents regarding their goals and preferences may be beneficial.<sup>37</sup> Also, whether there are  
15  
16 differences in parent-child interactions between children with a genetic disease (early  
17  
18 diagnosis, e.g. CF) and those with an acquired disease (later diagnosis, e.g. autoimmune  
19  
20 disease or childhood cancer) is of interest.  
21  
22  
23  
24  
25

## 26 **CONCLUSIONS**

27  
28 To optimize the child's daily life participation and well-being, understanding the parents'  
29  
30 goals and how parents and children interrelate can allow children, parents, and healthcare  
31  
32 professionals to establish and achieve mutual goals. Starting a conversation regarding the  
33  
34 child's and parent's goals and decisions may help children and parents find effective ways to  
35  
36 interrelate, while allowing the child to increase his/her autonomy.  
37  
38  
39  
40  
41  
42  
43  
44  
45  
46  
47  
48  
49  
50  
51  
52  
53  
54  
55  
56  
57  
58  
59  
60

### ACKNOWLEDGEMENTS

The authors would like to acknowledge the contribution of the patients and parents who participated in this study and the involved caregivers. The authors also thank dr. C.F. Barrett for his assistance with English language editing.

### WHAT IS KNOWN:

- An increasing number of children grow up with a chronic disease that majorly impacts their participation in daily life.
- A child's parents play an essential role in driving the child's participation.
- Understanding the parent's as well as the child's perspective helps lay the foundation for establishing mutual goals and a patient-centred approach regarding the child's participation.

### WHAT THIS STUDY ADDS:

- Parents described participation as primarily a means to achieve the child's well-being, whereas children described participation as more of a goal in itself.
- The degree of friction between parents and their child was based on the level of agreement on who takes the lead regarding the child's participation.
- Starting a conversation regarding the child's and parent's goals and decisions may help children and parents find effective ways to interrelate.

**REFERENCES**

1. Perrin JM, Bloom SR, Gortmaker SL. The Increase of Childhood Chronic Conditions in the United States. *JAMA*. 2007;297(24):2755. doi:10.1001/jama.297.24.2755
2. Zan H, Scharff RL. The Heterogeneity in Financial and Time Burden of Caregiving to Children with Chronic Conditions. *Matern Child Health J*. 2015;19(3):615-625. doi:10.1007/s10995-014-1547-3
3. Pinquart M, Teubert D. Academic, physical, and social functioning of children and adolescents with chronic physical illness: a meta-analysis. *J Pediatr Psychol*. 2012;37(4):376-389. doi:10.1093/jpepsy/jsr106
4. Leeman J, Crandell JL, Lee A, Bai J, Sandelowski M, Knaf K. Family Functioning and the Well-Being of Children With Chronic Conditions: A Meta-Analysis. *Res Nurs Health*. 2016;39(4):229-243. doi:10.1002/nur.21725
5. Nap-van der Vlist MM, Kars MC, Berkelbach van der Sprenkel EE, et al. Daily life participation in childhood chronic disease: a qualitative study. *Arch Dis Child*. 2020;105(5):463-469. doi:10.1136/archdischild-2019-318062
6. Martin Ginis KA, Evans MB, Mortenson W Ben, Noreau L. Broadening the Conceptualization of Participation of Persons With Physical Disabilities: A Configurative Review and Recommendations. *Arch Phys Med Rehabil*. 2017;98(2):395-402. doi:10.1016/j.apmr.2016.04.017
7. Westergren T, Berntsen S, Ludvigsen MS, et al. Relationship between physical activity level and psychosocial and socioeconomic factors and issues in children and adolescents with asthma. *JBIS Database Syst Rev Implement Reports*. 2017;15(8):2182-2222. doi:10.11124/JBISRIR-2016-003308
8. Willis C, Girdler S, Thompson M, Rosenberg M, Reid S, Elliott C. Elements contributing to meaningful participation for children and youth with disabilities: a

- 1  
2  
3 scoping review. *Disabil Rehabil.* 2017;39(17):1771-1784.  
4  
5 doi:10.1080/09638288.2016.1207716  
6  
7  
8 9. Hoefnagels JW, Kars MC, Fischer K, Schutgens R, Schrijvers LH. The Perspectives of  
9  
10 Adolescents and Young Adults on Adherence to Prophylaxis in Hemophilia: A  
11  
12 Qualitative Study. *Patient Prefer Adherence.* 2020;14:163-171.  
13  
14 doi:10.2147/PPA.S232393  
15  
16  
17 10. Minuchin P. Families and Individual Development : Provocations from the Field of  
18  
19 Family Therapy Author ( s ): Patricia Minuchin Published by : Wiley on behalf of the  
20  
21 Society for Research in Child Development Stable URL :  
22  
23 <http://www.jstor.org/stable/1129720> REFERENCES. *Child Dev.* 1985;56(2):289-302.  
24  
25 doi:10.1002/pen.21025  
26  
27  
28 11. Schmidt S, Petersen C, Bullinger M. Coping with chronic disease from the perspective  
29  
30 of children and adolescents--a conceptual framework and its implications for  
31  
32 participation. *Child Care Health Dev.* 2003;29(1):63-75. Accessed July 10, 2019.  
33  
34 <http://www.ncbi.nlm.nih.gov/pubmed/12534568>  
35  
36  
37 12. Kars MC, Grypdonck MHF, de Bock LC, van Delden JJM. The parents' ability to  
38  
39 attend to the "voice of their child" with incurable cancer during the palliative phase.  
40  
41 *Heal Psychol.* 2015;34(4):446-452. doi:10.1037/hea0000166  
42  
43  
44 13. Wallander JL, Varni JW. Effects of pediatric chronic physical disorders on child and  
45  
46 family adjustment. *J Child Psychol Psychiatry.* 1998;39(1):29-46. Accessed February  
47  
48 14, 2019. <http://www.ncbi.nlm.nih.gov/pubmed/9534085>  
49  
50  
51 14. Gutman T, Hanson C, Bernays S, et al. Child and Parental Perspectives on  
52  
53 Communication and Decision Making in Pediatric CKD: A Focus Group Study. *Am J*  
54  
55 *Kidney Dis.* 2018;72(4). doi:10.1053/J.AJKD.2018.05.005  
56  
57  
58 15. Coyne I, Amory A, Kiernan G, Gibson F. Children's participation in shared decision-  
59  
60

- 1  
2  
3 making: children, adolescents, parents and healthcare professionals' perspectives and  
4 experiences. *Eur J Oncol Nurs*. 2014;18(3):273-280. doi:10.1016/j.ejon.2014.01.006  
5  
6  
7  
8 16. Peeters MAC, Hilberink SR, van Staa A. The road to independence: lived experiences  
9 of youth with chronic conditions and their parents compared. *J Pediatr Rehabil Med*.  
10 2014;7(1):33-42. doi:10.3233/PRM-140272  
11  
12  
13  
14  
15 17. Fereday J, MacDougall C, Spizzo M, Darbyshire P, Schiller W. "There's nothing  
16 I can't do – I just put my mind to anything and I can do it": a qualitative analysis  
17 of how children with chronic disease and their parents account for and manage physical  
18 activity. *BMC Pediatr*. 2009;9(1):1. doi:10.1186/1471-2431-9-1  
19  
20  
21  
22  
23  
24 18. Hilberink SR, van Ool M, van der Stege HA, et al. Skills for Growing Up-Epilepsy: An  
25 exploratory mixed methods study into a communication tool to promote autonomy and  
26 empowerment of youth with epilepsy. *Epilepsy Behav*. 2018;86:116-123.  
27  
28  
29  
30  
31  
32  
33  
34 19. Dierckx de Casterlé B, Gastmans C, Bryon E, Denier Y. QUAGOL: A guide for  
35 qualitative data analysis. *Int J Nurs Stud*. 2012;49(3):360-371.  
36  
37  
38  
39  
40  
41  
42  
43 20. Creswell J. *Qualitative Inquiry & Research Design: Choosing among Five Approaches*  
44 (3rd Ed.). Thousand Oaks, CA: SAGE.; 2013.  
45  
46  
47  
48 21. Gordijn MS, Suzanne, Cremers EMP, Kaspers GJL, Gemke RJJ. Fatigue in children:  
49 reliability and validity of the Dutch PedsQL™ Multidimensional Fatigue Scale. *Qual*  
50 *Life Res*. 2011;20(7):1103-1108. doi:10.1007/s11136-010-9836-9  
51  
52  
53  
54 22. Rosier EM, Iadarola MJ, Coghill RC. Reproducibility of pain measurement and pain  
55 perception. *Pain*. 2002;98(1-2):205-216. Accessed May 31, 2019.  
56  
57  
58  
59 23. Charmaz K. *Constructing Grounded Theory. 2nd Edition*. Sonoma State University,  
60

- 1  
2  
3 USA; 2014.  
4  
5  
6 24. Pope C, Ziebland S, Mays N. Qualitative research in health care. Analysing qualitative  
7 data. *BMJ*. 2000;320(7227):114-116. Accessed December 21, 2018.  
8  
9 <http://www.ncbi.nlm.nih.gov/pubmed/10625273>  
10  
11  
12 25. Morse J, Barret M, Mayan M, Olson K, Spiers J. Verification strategies for establishing  
13 reliability and validity in qualitative research. *Int J Qual Meth*. 2002;1(2).  
14  
15  
16 26. VERBI Software. MAXQDA 2018. Published online 2017.  
17  
18  
19 27. Imms C, Granlund M, Wilson PH, Steenbergen B, Rosenbaum PL, Gordon AM.  
20 Participation, both a means and an end: a conceptual analysis of processes and  
21 outcomes in childhood disability. *Dev Med Child Neurol*. 2017;59(1):16-25.  
22  
23  
24  
25  
26  
27  
28  
29 28. Harden J, Black R, Chin R. Families' experiences of living with pediatric epilepsy: A  
30 qualitative systematic review. *Epilepsy Behav*. 2016;60.  
31  
32  
33  
34  
35  
36  
37  
38  
39  
40  
41  
42  
43  
44  
45  
46  
47  
48  
49  
50  
51  
52  
53  
54  
55  
56  
57  
58  
59  
60
24. Pope C, Ziebland S, Mays N. Qualitative research in health care. Analysing qualitative data. *BMJ*. 2000;320(7227):114-116. Accessed December 21, 2018. <http://www.ncbi.nlm.nih.gov/pubmed/10625273>
25. Morse J, Barret M, Mayan M, Olson K, Spiers J. Verification strategies for establishing reliability and validity in qualitative research. *Int J Qual Meth*. 2002;1(2).
26. VERBI Software. MAXQDA 2018. Published online 2017.
27. Imms C, Granlund M, Wilson PH, Steenbergen B, Rosenbaum PL, Gordon AM. Participation, both a means and an end: a conceptual analysis of processes and outcomes in childhood disability. *Dev Med Child Neurol*. 2017;59(1):16-25. doi:10.1111/dmcn.13237
28. Harden J, Black R, Chin R. Families' experiences of living with pediatric epilepsy: A qualitative systematic review. *Epilepsy Behav*. 2016;60. doi:10.1016/J.YEBEH.2016.04.034
29. Bailey PK, Hamilton AJ, Clissold RL, et al. Young adults' perspectives on living with kidney failure: a systematic review and thematic synthesis of qualitative studies. *BMJ Open*. 2018;8(1):e019926. doi:10.1136/bmjopen-2017-019926
30. Tong A, Jones J, Craig JC, Singh-Grewal D. Children's experiences of living with juvenile idiopathic arthritis: a thematic synthesis of qualitative studies. 2012;64(9). doi:10.1002/acr.21695
31. Lambert V, Keogh D. Striving to live a normal life: a review of children and young people's experience of feeling different when living with a long term condition. *J Pediatr Nurs*. 2015;30(1):63-77. doi:10.1016/j.pedn.2014.09.016
32. Jamieson N, Fitzgerald D, Singh-Grewal D, Hanson CS, Craig JC, Tong A. Children's experiences of cystic fibrosis: a systematic review of qualitative studies. *Pediatrics*.

- 1  
2  
3 2014;133(6):e1683-97. doi:10.1542/peds.2014-0009  
4  
5  
6 33. Loades ME, James V, Baker L, Jordan A, Sharma A. Parental Experiences of  
7  
8 Adolescent Cancer-Related Fatigue: A Qualitative Study. *J Pediatr Psychol*.  
9  
10 2020;45(10):1093-1102. doi:10.1093/jpepsy/jsaa080  
11  
12 34. Belpame N, Kars MC, Beeckman D, et al. "The AYA Director": A  
13  
14 Synthesizing Concept to Understand Psychosocial Experiences of Adolescents and  
15  
16 Young Adults With Cancer. *Cancer Nurs*. 2016;39(4):292-302.  
17  
18 doi:10.1097/NCC.0000000000000307  
19  
20  
21 35. Quirk H, Blake H, Dee B, Glazebrook C. "You can't just jump on a bike and go": a  
22  
23 qualitative study exploring parents' perceptions of physical activity in children with  
24  
25 type 1 diabetes. *BMC Pediatr*. 2014;14(1):313. doi:10.1186/s12887-014-0313-4  
26  
27  
28 36. Smith J, Cheater F, Bekker H. Parents' experiences of living with a child with a long-  
29  
30 term condition: a rapid structured review of the literature. *Health Expect*.  
31  
32 2015;18(4):452-474. doi:10.1111/hex.12040  
33  
34  
35 37. Fahner JC, Beunders AJM, van der Heide A, et al. Interventions Guiding Advance Care  
36  
37 Planning Conversations: A Systematic Review. *J Am Med Dir Assoc*. 2019;20(3):227-  
38  
39 248. doi:10.1016/j.jamda.2018.09.014  
40  
41  
42  
43  
44  
45  
46  
47  
48  
49  
50  
51  
52  
53  
54  
55  
56  
57  
58  
59  
60



Table 1. Summary of the participating children and their parents

| Variable                            | Category                                                           | N  | %    | Median (IQR)     |
|-------------------------------------|--------------------------------------------------------------------|----|------|------------------|
| Parent(s) present at the interview  | Mother                                                             | 22 | 71.0 |                  |
|                                     | Father                                                             | 1  | 3.2  |                  |
|                                     | Both parents                                                       | 8  | 25.8 |                  |
| Parent's age (N=28)*                | <40 years                                                          | 3  | 10.7 | 48.1 (35.4-54.2) |
|                                     | 40-49 years                                                        | 15 | 53.6 |                  |
|                                     | ≥50 years                                                          | 10 | 35.7 |                  |
| Child's sex                         | Female                                                             | 19 | 61.3 |                  |
|                                     | Male                                                               | 12 | 38.7 |                  |
| Child's age                         | 8-11 years                                                         | 12 | 38.7 | 13.1 (8.0-19.1)  |
|                                     | 12-15 years                                                        | 11 | 35.5 |                  |
|                                     | 16-19 years                                                        | 8  | 25.8 |                  |
| Disease/Condition                   | Cystic fibrosis                                                    | 11 | 35.5 |                  |
|                                     | Autoimmune disease                                                 | 11 | 35.5 |                  |
|                                     | Post-cancer treatment                                              | 9  | 29.0 |                  |
| School presence in the past 2 weeks | Total                                                              | 31 | 100  | 100 (0-100)      |
|                                     | ≥90% of the time                                                   | 21 | 77.8 |                  |
|                                     | <90% of the time                                                   | 10 | 32.2 |                  |
| Fatigue**                           | PedsQL general fatigue score (range 0-100)                         | 31 | 100  | 79.2 (25-100)    |
|                                     | Fatigued (score of >1 SD below the reference values on PedsQL MFS) | 12 | 38.7 |                  |
| Pain                                | VAS (range 0-10)                                                   | 31 | 100  | 2.0 (0-9)        |
|                                     | VAS ≥3 over the past week                                          | 11 | 35.5 |                  |

*PedsQL MFS = Paediatric Quality of Life Inventory Multidimensional Fatigue Scale; SD = standard deviation; IQR, interquartile range; VAS = visual analogue scale. \*Only available for 28 parents. \*\*Score 0-100, with lower scores indicating increased fatigue.*

Table 2. Parental strategies regarding their child's participation identified in this study.

| Parental strategy                                   | Description                                                                                                                                                                                                                                                                                                                                                       | Example case                                                                                                                                                                                                                                                                                                                                                                                                                                                                                                        |
|-----------------------------------------------------|-------------------------------------------------------------------------------------------------------------------------------------------------------------------------------------------------------------------------------------------------------------------------------------------------------------------------------------------------------------------|---------------------------------------------------------------------------------------------------------------------------------------------------------------------------------------------------------------------------------------------------------------------------------------------------------------------------------------------------------------------------------------------------------------------------------------------------------------------------------------------------------------------|
| Allowing the child to steer their own participation | Using this strategy, parents attempted to let their child take the lead with as little interference as possible, in order to promote the child's self-sufficiency and autonomy.                                                                                                                                                                                   | <i>"I'm not the one who should forbid it. For example, she tried dancing for six months, and it didn't go well at all. I could have forbidden it, but thought it was better that she found out for herself. Now she really likes free running, even though she can't keep up. But the kids there know that, and she does what she can. She's getting exercise, and she enjoys being part of a group. I can see she is benefitting from it and that it's going well. But do I think it's sensible? No, I don't."</i> |
| Normalising the situation                           | Using this strategy, parents promoted the belief that their child participates just like his/her healthy peers. They also either avoided or tried to change the perspective of others who view their child as limited compared to his/her peers.                                                                                                                  | <i>"She now thinks her situation is normal; maybe she's always in pain, but she doesn't know any better. She just does everything. She says herself that this is her "normal" and that she doesn't know any better than this. It has been like this since she was 5, and she doesn't really know what normal is."</i>                                                                                                                                                                                               |
| Relieving the child from burdens                    | Using this strategy, parents attempted to relieve their child from obligatory activities such as school, appointments, their therapeutic regimen, or the child's responsibility to disclose his/her limitations to others.                                                                                                                                        | <i>"So, we said it was OK to get a dog, but everyone will have to walk the dog every day, especially J, even in bad weather. But that's not strictly true. I often do it in bad weather, because this time of year (fall), her symptoms are often worse."</i>                                                                                                                                                                                                                                                       |
| Facilitating the child                              | Using this strategy, parents adjusted their own life and their family life as much as possible. The resources for achieving this strategy can be personal (e.g. time investment such as a parent who quits his/her job in order to be home for the child), social (e.g. siblings taking over the child's tasks), or financial (e.g. buying additional equipment). | <i>"J. is going to high school next year, and we wonder how he's going to get on. Right now, his bag is packed for him, including snacks; his exercise is arranged, and his bike is ready for him outside the door. His brother does all that for him now, but next year he'll have to do it himself. Other 11-year-old boys can be allowed to bike to the gym on their own, but not J; we have to take him there and pick him up."</i>                                                                             |
| Disclosure                                          | Using this strategy, parents directed the disclosure of their child's disease and limitations to the                                                                                                                                                                                                                                                              | <i>Ex. 1) "She went into a new class, and we said that no one was allowed to ask M. anything about her condition. If they wanted</i>                                                                                                                                                                                                                                                                                                                                                                                |

|                               |                                                                                                                                                                                                                                                                                                                                                                                                                                                                     |                                                                                                                                                                                                                                                                                                                                                                                                                                                                                                                                                                                                                                             |
|-------------------------------|---------------------------------------------------------------------------------------------------------------------------------------------------------------------------------------------------------------------------------------------------------------------------------------------------------------------------------------------------------------------------------------------------------------------------------------------------------------------|---------------------------------------------------------------------------------------------------------------------------------------------------------------------------------------------------------------------------------------------------------------------------------------------------------------------------------------------------------------------------------------------------------------------------------------------------------------------------------------------------------------------------------------------------------------------------------------------------------------------------------------------|
|                               | <p>outside world. In some cases, the parents deliberately chose not to disclose the child's condition, or even temporarily withdrew the child from participating, in order to hide their child's illness or limitations. Other parents chose to disclose the child's disease and limitations on their child's behalf so that the child did not have to do this him/herself and the environment could still be adjusted to accommodate the child's capabilities.</p> | <p><i>to know anything, they were to come to us, and we would explain what happened and that she is now better. M. didn't want to talk about it then, but now she's opened up a bit."</i></p> <p><i>Ex. 2) "Because J. had a group of close friends, it wasn't necessary to communicate it to the entire class. When he went to play with a friend, I just said that J. had a problem with his immune system and that there were some minor hygiene rules to follow, especially when he eats (he has to take pills before he eats anything). We keep it vague, so people don't start Googling and labelling him; he can just be J."</i></p> |
| Redirecting the child         | <p>Using this strategy, parents directly tried to influence the child and what he/she could do either by explicitly telling the child what he/she can and cannot do (e.g. they cannot go on a school trip because it would make them too tired) or by attempting to persuade the child to do or not do certain activities (e.g. to take their medication when away from home or to stop physical exercise when they experience pain).</p>                           | <p><i>"Yes, she didn't need to make that decision. But that's me; I make a lot of decisions on her behalf. I don't know if this is a good thing or not, but both of us are very strict at home; we don't believe much in that 'yes, but' culture. I am perfectly willing to explain why I made a certain decision, but we do what I decide we will do."</i></p>                                                                                                                                                                                                                                                                             |
| Redirecting the outside world | <p>Using this strategy, parents tried to influence their child's environment, for example by asking the child's teacher to give him/her a different seat in class so the child would be less cold, or persuading other parents to invite him/her to a party, even though their child may not be able to participate in all of the activities.</p>                                                                                                                   | <p><i>"When she started at a dance school, we spoke with them beforehand. But within two weeks she was sitting on the side for three-quarters of the hour. So we stopped taking her there. She's now at another dance school; we spoke to the new dance teacher first, and she includes E. in everything. Her teacher even choreographs special dances for her, so she can take part in performances and demonstrations."</i></p>                                                                                                                                                                                                           |

Table 3. Four ways parents and their child interrelate when their goals are either aligned or not aligned, based on a combination of the parents' viewpoint and the child's viewpoint.

|                       |                                                     | The parents' viewpoint                               |                                                              |
|-----------------------|-----------------------------------------------------|------------------------------------------------------|--------------------------------------------------------------|
|                       |                                                     | We take the lead regarding the child's participation | Our child takes the lead regarding his/her own participation |
| The child's viewpoint | My parents take the lead regarding my participation | The parents take the lead                            | Neither the parents nor the want to take the lead            |
|                       | I take the lead regarding my own participation      | Both the parents and the child want to take the lead | The child takes the lead                                     |

1  
2  
3  
4  
5  
6  
7  
8  
9  
10  
11  
12  
13  
14  
15  
16  
17  
18  
19  
20  
21  
22  
23  
24  
25  
26  
27  
28  
29  
30  
31  
32  
33  
34  
35  
36  
37  
38  
39  
40  
41  
42  
43  
44  
45  
46  
47  
48  
49  
50  
51  
52  
53  
54  
55  
56  
57  
58  
59  
60

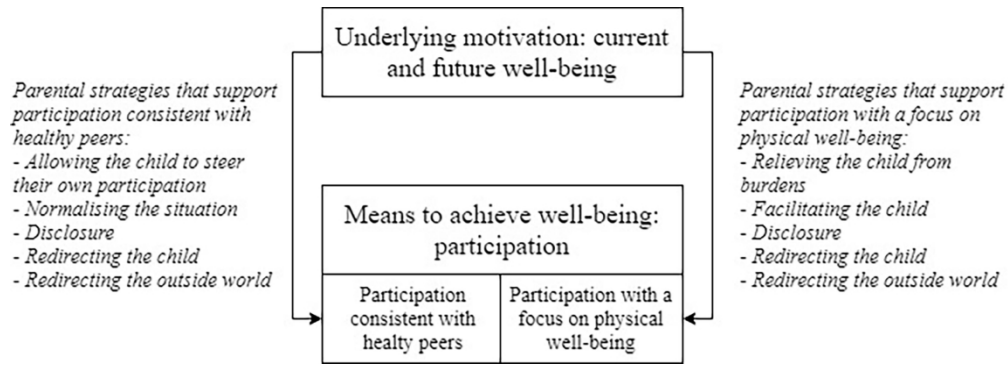

237x85mm (300 x 300 DPI)

# BMJ Paediatrics Open

## Daily life participation in childhood chronic disease: a qualitative study on the child's and parent's perspective

|                               |                                                                                                                                                                                                                                                                                                                                                                                                                                                                                                                                                                                                                                                                                                                                                                                                                                                                                                                                                                                                                                                                                        |
|-------------------------------|----------------------------------------------------------------------------------------------------------------------------------------------------------------------------------------------------------------------------------------------------------------------------------------------------------------------------------------------------------------------------------------------------------------------------------------------------------------------------------------------------------------------------------------------------------------------------------------------------------------------------------------------------------------------------------------------------------------------------------------------------------------------------------------------------------------------------------------------------------------------------------------------------------------------------------------------------------------------------------------------------------------------------------------------------------------------------------------|
| Journal:                      | <i>BMJ Paediatrics Open</i>                                                                                                                                                                                                                                                                                                                                                                                                                                                                                                                                                                                                                                                                                                                                                                                                                                                                                                                                                                                                                                                            |
| Manuscript ID                 | bmjpo-2021-001057.R1                                                                                                                                                                                                                                                                                                                                                                                                                                                                                                                                                                                                                                                                                                                                                                                                                                                                                                                                                                                                                                                                   |
| Article Type:                 | Original research                                                                                                                                                                                                                                                                                                                                                                                                                                                                                                                                                                                                                                                                                                                                                                                                                                                                                                                                                                                                                                                                      |
| Date Submitted by the Author: | 10-Apr-2021                                                                                                                                                                                                                                                                                                                                                                                                                                                                                                                                                                                                                                                                                                                                                                                                                                                                                                                                                                                                                                                                            |
| Complete List of Authors:     | Nap-van der Vlist, Merel; Wilhelmina Children's Hospital University Medical Centre, Paediatrics<br>Berkelbach van der Sprenkel, Emma; Wilhelmina Children's Hospital, University Medical Center Utrecht, Paediatrics<br>Nijhof, Linde; Wilhelmina Children's Hospital, University Medical Center Utrecht, Paediatrics<br>Grootenhuis, Martha; Princess Máxima Center for Paediatric Oncology, Psycho-oncology<br>van der Ent, Kors; University Medical Center Utrecht, Cystic Fibrosis Center and Department of Pediatric Respiratory Medicine<br>Swart, Joost; Wilhelmina Children's Hospital, University Medical Center Utrecht, Paediatric Rheumatology<br>van Royen-Kerkhof, A; Wilhelmina Children's Hospital, University Medical Center Utrecht, Pediatrics<br>van Grotel, Martine; Princess Máxima Center for Paediatric Oncology, Oncology<br>van de Putte, Elise M.; Wilhelmina Children's Hospital, General Pediatrics<br>Nijhof, Sanne L.; Wilhelmina Children's Hospital University Medical Centre<br>Kars, Marijke C.; Julius Center for Health Sciences and Primary Care |
| Keywords:                     | Cystic Fibrosis, Qualitative research, Rheumatology                                                                                                                                                                                                                                                                                                                                                                                                                                                                                                                                                                                                                                                                                                                                                                                                                                                                                                                                                                                                                                    |
|                               |                                                                                                                                                                                                                                                                                                                                                                                                                                                                                                                                                                                                                                                                                                                                                                                                                                                                                                                                                                                                                                                                                        |

SCHOLARONE™  
Manuscripts

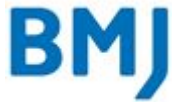

I, the Submitting Author has the right to grant and does grant on behalf of all authors of the Work (as defined in the below author licence), an exclusive licence and/or a non-exclusive licence for contributions from authors who are: i) UK Crown employees; ii) where BMJ has agreed a CC-BY licence shall apply, and/or iii) in accordance with the terms applicable for US Federal Government officers or employees acting as part of their official duties; on a worldwide, perpetual, irrevocable, royalty-free basis to BMJ Publishing Group Ltd ("BMJ") its licensees and where the relevant Journal is co-owned by BMJ to the co-owners of the Journal, to publish the Work in this journal and any other BMJ products and to exploit all rights, as set out in our [licence](#).

The Submitting Author accepts and understands that any supply made under these terms is made by BMJ to the Submitting Author unless you are acting as an employee on behalf of your employer or a postgraduate student of an affiliated institution which is paying any applicable article publishing charge ("APC") for Open Access articles. Where the Submitting Author wishes to make the Work available on an Open Access basis (and intends to pay the relevant APC), the terms of reuse of such Open Access shall be governed by a Creative Commons licence – details of these licences and which [Creative Commons](#) licence will apply to this Work are set out in our licence referred to above.

Other than as permitted in any relevant BMJ Author's Self Archiving Policies, I confirm this Work has not been accepted for publication elsewhere, is not being considered for publication elsewhere and does not duplicate material already published. I confirm all authors consent to publication of this Work and authorise the granting of this licence.

1  
2  
3 **Daily life participation in childhood chronic disease: a qualitative study on**  
4 **the child's and parent's perspective**  
5  
6  
7

8 Nap-van der Vlist MM<sup>a</sup>, Berkelbach van der Sprenkel EE<sup>a</sup>, Nijhof LN<sup>a</sup>, Grootenhuis MA<sup>b</sup>,  
9 van der Ent CK<sup>c</sup>, Swart JF<sup>d</sup>, van Royen-Kerkhof A<sup>d</sup>, van Grotel M<sup>b</sup>, van de Putte EM<sup>a</sup>, Nijhof  
10 SL<sup>a</sup>, Kars MC<sup>e</sup>.  
11

12  
13  
14 <sup>a</sup> Department of Paediatrics, Wilhelmina Children's Hospital, University Medical Centre  
15 Utrecht, Utrecht University, Utrecht, the Netherlands

16 <sup>b</sup> Princess Máxima Centre for Paediatric Oncology, Utrecht, the Netherlands

17  
18 <sup>c</sup> Department of Paediatric Pulmonology, Wilhelmina Children's Hospital, University Medical  
19 Centre Utrecht, Utrecht University, Utrecht, the Netherlands

20  
21 <sup>d</sup> Department of Paediatric Rheumatology/Immunology, Wilhelmina Children's Hospital,  
22 University Medical Centre Utrecht, Utrecht University, Utrecht, The Netherlands

23  
24 <sup>e</sup> Julius Centre for Health Sciences and Primary Care, University Medical Centre Utrecht,  
25 Utrecht University, Utrecht, the Netherlands  
26

27 **CORRESPONDING AUTHOR:**

28 Merel M. Nap-van der Vlist, MSc, Department of Paediatrics, Wilhelmina Children's  
29 Hospital.  
30

31 Postal address: HP KE.04.133.1, PO Box 85090, 3508 AB, Utrecht, The Netherlands.

32 E-mail: m.m.vandervlist-3@umcutrecht.nl

33 Phone: +31 88 756 3100 Fax: +31 88 755 5349  
34  
35

36 **WORD COUNT:** 2499 words  
37  
38

39 **SHORT TITLE:** Daily life participation in children with chronic disease  
40  
41

42 **ABBREVIATIONS:** juvenile idiopathic arthritis (JIA); Paediatric Quality of Life Inventory  
43  
44 Multidimensional Fatigue Scale (PedsQL MFS); visual analogue scale (VAS).  
45  
46  
47

48 **KEY WORDS:** qualitative study, participation, children, chronic disease  
49  
50  
51  
52  
53  
54  
55  
56  
57  
58  
59  
60



## ABSTRACT

**Objective:** To understand how a child with a stable chronic disease and his/her parents shape his/her daily life participation, we assessed: 1) the parents' goals regarding the child's daily life participation, 2) parental strategies regarding the child's participation, and 3) how children and their parents interrelate when their goals regarding participation are not aligned.

**Methods:** This was a qualitative study design using a general inductive approach. Families of children 8-19 years with a stable chronic disease (cystic fibrosis, autoimmune disease, or post-cancer treatment) were recruited from the PROactive study. Simultaneous in-depth interviews were conducted separately with the child and parent(s). Analyses included constant comparison, coding, and categorization.

**Results:** Thirty-one of the 57 invited families (54%) participated. We found that parents predominantly focus on securing their child's well-being, using participation as a means to achieve well-being. Moreover, parents used different strategies to either support participation consistent with the child's healthy peers or support participation with a focus on physical well-being. The degree of friction between parents and their child was based on the level of agreement on who takes the lead regarding the child's participation.

**Conclusions:** Interestingly, parents described participation as primarily a means to achieve the child's well-being, whereas children described participation as more of a goal in itself. Understanding the child's and parent's perspective can help children, parents, and healthcare professionals start a dialogue on participation and establish mutual goals. This may help parents and children find ways to interrelate while allowing the child to develop his/her autonomy.

## INTRODUCTION

Children with a chronic disease are often unable to achieve the same level of participation in daily life as healthy children.<sup>1</sup> The World Health Organization defines participation as “involvement in a life situation”, such as engaging in social interactions or taking on a role in sports or academia.<sup>2</sup> A chronic disease can have a major impact on many aspects of life of both the child and his/her family.<sup>3-5</sup> As an increasing number of children grow up with a chronic disease, the consequences of their disease on their daily life participation become increasingly evident.<sup>1</sup> We previously described the child’s perspective on “full participation” among children with a chronic disease.<sup>6</sup> We found that these children feel that participation encompasses more than engaging in activities; indeed, they described having a sense of belonging, the ability to affect social interactions, and the capacity to keep up with healthy peers as key elements.<sup>6-10</sup>

Parents form their child’s primary social network and can have a major impact on their child’s daily life participation, especially because the presence of a chronic disease can affect the parent-child relationship and increases the child’s dependency.<sup>11-13</sup> It is crucial to understand how parents perceive their child’s daily life participation, as well as their goals regarding their child’s participation.<sup>14</sup> In addition to the child’s perspective, this can help lay the foundation for establishing mutual goals and a patient-centred approach regarding the child’s participation.<sup>12,15,16</sup> Paired qualitative analyses in this field are scarce, but provide important insights into the child-parent relationship and the role of their collaboration in shaping the child’s daily life.<sup>17-19</sup> The aim of this study was to determine: 1) the parent’s goal regarding the daily life participation of their child with a chronic disease, 2) parental strategies regarding the child’s participation, and 3) how the child and his/her parents interrelate when their goals regarding the child’s participation are not aligned.

## METHODS

We used an explorative qualitative interview study design to examine parents' view regarding their child's participation, as well as how the child and his/her parents interrelate regarding the child's participation. We used a general inductive approach and the Qualitative Analysis Guide of Leuven method proposed by Dierckx de Casterlé et al.<sup>20</sup>

Patient organisations were involved in setting the agenda and the priorities for this research. Children and their parents were involved in the conduct of this study. Patient organisations and societal partners are involved in the dissemination of our research.

Families were purposefully recruited in accordance with qualitative sampling strategies<sup>21</sup> from the PROactive study cohort, which consists of children with cystic fibrosis, an autoimmune disease, or children within one year post-cancer treatment at the Wilhelmina Children's Hospital and the Princess Máxima Centre for Paediatric Oncology in the Netherlands. Children who were interviewed were 8-19 years of age, in a stable phase of their disease, and able to verbally communicate about their participation (both determined by their treating physician). Maximum variation was sought in the children's age, sex, school absences, and fatigue and pain levels.<sup>21</sup> In the PROactive cohort, fatigue was assessed using the Multidimensional Fatigue Scale of the Paediatric Quality of Life Inventory,<sup>22</sup> school absences over the previous 2 weeks and 6 months were reported, and average pain experienced over the previous week was reported on a visual analogue scale.<sup>23</sup>

Families were approached by the child's treating physician. If they were willing to participate, the child and his/her parent(s) were interviewed face-to-face at the same time (in separate interviews) by trained interviewers on qualitative interview techniques. The interviewers did

1  
2  
3 not know the participants beforehand, and no characteristics or motivations of the  
4  
5 interviewers were revealed before the interview. An in-depth semi-structured interview lasting  
6  
7 60-90 minutes was used.<sup>24</sup> The interviews were held by two female psychologists (EB and  
8  
9 LN; MSc) and one female medical doctor (MN). We used separate interview guides covering  
10  
11 the same topics for the children and parents, based on the published literature and the research  
12  
13 team's expertise. The interview began with an open-ended question. For parents this was:  
14  
15 "What do you notice with respect to the impact that your child's disease has on his/her  
16  
17 participation in daily life?". For children this was: "To what extent does your disease affect  
18  
19 your daily life?". We then focused on the children's and parents' experiences and  
20  
21 perspectives. All interviews were audio recorded and transcribed verbatim and field notes  
22  
23 were made.  
24  
25  
26  
27  
28  
29  
30

31 Data were analysed using two intertwined strategies, namely coding and theoretical thinking,  
32  
33 while alternating between data collection and analysis.<sup>20,25,26</sup> Our previous report focused on  
34  
35 our analysis of the children's interviews.<sup>6</sup> Here, we first analysed all of the transcripts of the  
36  
37 parents' interviews and then analysed the children's and parents' paired transcripts in order to  
38  
39 determine how children and their parents interrelate when their participation goals are not  
40  
41 aligned. Two researchers (MN and EB) started with open coding, after which the identified  
42  
43 codes were reviewed by the remaining core team researchers (MK and SN) in order to reach  
44  
45 consensus on the interpretation of the concepts. We used researcher triangulation and constant  
46  
47 comparisons in order to achieve a thorough understanding of the qualitative material.<sup>20,25</sup> The  
48  
49 whole team, consisting of seven researchers from a variety of backgrounds, including  
50  
51 paediatric nursing, medicine, and psychology, checked the findings and validated the results.  
52  
53  
54 No repeat interviews were carried out nor were transcripts returned. Coding was achieved  
55  
56 using the MAXQDA software program.<sup>27</sup>  
57  
58  
59  
60

## RESULTS

Of the 57 invited families, 31 (54%) participated. Reasons given for declining to participate included currently being involved in another study and the child finding it too burdensome to talk about his/her disease. We interviewed all 31 children (median age 13.1 (8.0-19.1); 61% girls) individually, as well as 22 mothers, 1 father, and 8 parental couples (median parental age 48.1 (35.4-54.2); Table 1).

### *Parental goals regarding the child's participation*

Parents reported they predominantly focus on securing their child's current and future well-being. Well-being was defined as their child feeling good/happy or having a sense of fulfilment. Several domains can contribute to the child's well-being; physical, social, spiritual and psychological well-being. Interestingly, we found that how parents react to their child with respect to his/her participation was not necessarily motivated by the disease specific factors; rather, they were motivated by their perception of their child's well-being.

Participation was used as a means to accomplish well-being, but was not seen as a goal in itself. To increase their child's participation, parents predominantly used two approaches: 1) participation that matches the level of their child's healthy peers, and 2) participation with a focus on physical well-being. Although parents sometimes switched between these approaches to secure well-being, many had a preference for one (box 1).

When parents used the first approach, their goal was for their child to be perceived by his/her peers as not different, even though he/she was unable to perform the same activities. Parents attempted to treat their child similarly to his/her siblings and friends. Parents chose this approach because it aligned with their child's preferences, which supported his/her current

well-being, or to help their child grow socially from a developmental perspective, which was expected to support his/her future well-being.

On the other hand, when parents used the second approach, they strive for their child to have as few symptoms as possible, investing in an optimal therapeutic regimen in order to control their child's disease. Consequently, their child's ability to participate at the same level as his/her healthy peers was replaced by other forms of participation they considered less threatening to the child's physical well-being.

**Box 1. Example illustrating a mother using the two participation approaches.**

The mother of a ten-year-old boy with cystic fibrosis described: *"It is difficult when he goes to a party or a disco that goes on a bit late. I want him to be able to join in, but for two days afterwards he is very bad-tempered and tired, and he complains of having a stomach ache."*

With the child's well-being in mind, she can choose to let her son go to the party because she considers this beneficial to his current social, spiritual (sense of fulfilment) and psychological well-being, thereby meeting his desire to achieve full participation. Alternative, she can choose to not let her son go to the party because she believes the party would be dangerous to his physical well-being and that staying home will improve her son's social and emotional well-being in the near future.

***Parental strategies regarding the child's participation***

Figure 1 illustrates how the child's well-being plays a role in how the child's parents shape his/her participation, including the strategies parents can use to support the two approaches discussed above; these strategies are described in more detail in Table 2. It is important to

1  
2  
3 note that these various strategies require different amounts of parental investment, either  
4  
5 personal, social or financial.  
6  
7  
8  
9

### 10 *How parents and their child interrelate*

11  
12 Most children indicated that their goal was to achieve full participation, while most parents  
13  
14 indicated their goal was to optimize their child's well-being, using participation as means, not  
15  
16 as goal in itself. Sometimes, achieving both full participation and optimal well-being was  
17  
18 possible based on the child's and parent's perception. However, especially among children  
19  
20 whose well-being was decreased and among older children, the parents' goals and the child's  
21  
22 goals sometimes drifted apart.  
23  
24  
25  
26  
27

28  
29 In these cases, we distinguish four ways in which parents and children interrelated to each  
30  
31 other, based on who wants to take the lead regarding the child's participation (Scenarios one  
32  
33 to four in Table 3). In scenarios one and four parents and child agreed on who took the lead,  
34  
35 leading to minimal discussion and friction. In scenario two and three, parents and child did  
36  
37 not agree on who took the lead, leading to more friction and sometimes decreased disclosure  
38  
39 in the parent-child relationship (box 2). It is important to note that both the child and the  
40  
41 parents can change their viewpoint over time and depending on the situation (box 3).  
42  
43  
44  
45  
46

47 Box 2. Example illustrating how children and parents may react when their participation  
48 goals are not aligned.

49  
50  
51 Some children stopped disclosing their limitations or symptoms to their parents, thereby  
52  
53 reducing their parents' ability to direct them. The mother of a twelve-year-old girl which JIA  
54  
55 describes: "*She doesn't want to be any different, and she wants to join in. So even if she's in*  
56  
57 *pain she won't say so or give any indication that she's in pain or can't do something; she*  
58  
59  
60

1  
2  
3  
4  
5  
6  
7  
8  
9  
10  
11  
12  
13  
14  
15  
16  
17  
18  
19  
20  
21  
22  
23  
24  
25  
26  
27  
28  
29  
30  
31  
32  
33  
34  
35  
36  
37  
38  
39  
40  
41  
42  
43  
44  
45  
46  
47  
48  
49  
50  
51  
52  
53  
54  
55  
56  
57  
58  
59  
60

*never says so.” In response, the parents often attempted to “read” how their child felt. One sixteen-year-old girl with JIA described: “They sometimes ask me if I’m still not feeling well. Every day I just say yes. Well, maybe not every day, you know what I mean; they ask about it sometimes, but I wouldn’t tell them myself.”*

Box 3. Example illustrating a changing viewpoint of a parent regarding the child’s participation.

A mother of an eleven-year-old girl with generalized morphea scleroderma describes: “We’ve had times when we had to be really confrontational, where we said to E., ‘You can’t do it, so you aren’t allowed to do it...’ Back then, she used to get really angry about things and cry. She understands better now. Last year one of her classmates was having a party at a trampoline centre, but E. said herself that she wasn’t going to go. She said, ‘I would really have to pay for it for three days afterwards; I wouldn’t be able to walk for three days.’ It’s still the same now; when we go there, she really goes crazy for a while. Well that’s fine, if she thinks she can do it. She knows she won’t be able to walk the next day, but she does it anyway. Fine, it’s her choice.”

We saw scenario one primarily in families in which the child was relatively young. This scenario did not lead to considerable friction, as the parent made the final decisions regarding the child’s participation, and the child followed their decisions. Scenario two was mostly seen in older children. As children grow older, they search to increase their level of autonomy and are able to guide their own participation. In some cases, however, the parents – particularly parents with a child who is more limited by his/her disease – found it difficult to allow their



1  
2  
3 child to guide his/her own participation (boxes 2 and 4). This can lead to conflict between  
4  
5 parent and child. Parents noted that they were continuously having to find a balance between  
6  
7 their child's growing autonomy and their own goals in securing the child's well-being. In  
8  
9 some cases (scenario 3), the parents wished their child was more autonomous, but the child  
10  
11 did not want to take on the challenge of guiding his/her own participation. In the last scenario  
12  
13 (scenario 4), the child becomes more autonomous, and the parents let him/her determine  
14  
15 his/her own participation. The child essentially takes the lead, with the parents serving in a  
16  
17 more advisory role. All scenarios are illustrated with examples in Table 4.  
18  
19  
20  
21  
22  
23

24 Box 4. Example illustrating the way in which the child's disease can interfere with his/her  
25 autonomy.

26  
27  
28 One mother of a fourteen-year-old boy with common variable immunodeficiency disorder  
29  
30 described: *"Because someone is ill, you start trying to fix things, which means you are*  
31  
32 *actually not accepting someone for who they are. He can't accept what he is, even though he*  
33  
34 *wants nothing more than to be accepted for what he is. You very quickly notice that due to the*  
35  
36 *disease the child's 'ownership' of themselves is nipped in the bud, certainly when the child is*  
37  
38 *so young. Ownership of the body, but also of decisions and thoughts; that's what's nipped in*  
39  
40 *the bud, even though our society continually expects everyone to participate and be*  
41  
42 *independent, and to own themselves. So, on one hand you take a lot away from the child, and*  
43  
44 *on the other hand you force independence on them and expect them to undertake things. But*  
45  
46 *when it comes to them wanting to make an autonomous decision about something like getting*  
47  
48 *an injection, that's different; whether they like it or not, they have to get it. It is horrible*  
49  
50 *having to force a child to do awful things, both physically and mentally."*  
51  
52  
53  
54  
55  
56  
57  
58  
59  
60

## DISCUSSION

We aimed to describe the parents' and child's perspective on the daily life participation among chronically ill children. We found that parents predominantly focus on securing their child's well-being, using participation as a means to achieve well-being. We identified two approaches that parents take: *i*) participation consistent with their child's healthy peers, and *ii*) participation with a focus on their child's physical well-being. We found that parents use different strategies for supporting these approaches, and we found that friction can arise between parent and child when they felt different on who (i.e. parents or child) should take the lead regarding the child's participation.

A conceptual analysis based on the International Classification of Functioning, Disability and Health criteria describes participation as both a means and an end.<sup>28</sup> Interestingly, in our interviews parents described participation as primarily a means to achieve well-being, whereas children described participation as more of a goal in itself, as we previously reported.<sup>6</sup> This apparent discrepancy underscores the importance of establishing a dialogue regarding how participation should take place. Several aspects found in this study are in line with other major themes in qualitative studies among children with various chronic diseases and their parents. These include striving for normalcy or being more like the child's healthy peers,<sup>29-34</sup> and findings ways to manage the child's disease and symptoms, although the way in which parents and children managed this sometimes differed.<sup>10,17,19,30,31,33,35-37</sup>

These differences in viewpoint between parents and children can give rise to friction. The presence of a chronic disease can influence both the parent-child relationship and the child's path to autonomy, as it increases the child's dependency, particularly when additional care is needed and given that parents wish to protect their child.<sup>12-14,34</sup> In this regard, it is important

1  
2  
3 to take the child's age and developmental stage into account.<sup>38</sup> In our study we specifically  
4 saw that older children reported more friction and there was more often discussion regarding  
5 who should take the lead. Older children were also more capable to reflect on their own  
6 behaviour and that of their parents. Friction in the parent-child relationship has also been  
7 reported in other qualitative studies among young people with chronic diseases, which  
8 describe parents who find it difficult to allow their child to make his/her own choices, as well  
9 as children who feel unable to fulfil their desire for independence.<sup>10,15,17,33</sup> Our finding that  
10 sometimes neither the parents nor the child want to take the lead is also consistent with  
11 several studies that found that young people can be hesitant to take the lead, as they feel safer  
12 with their parents.<sup>10,17,19</sup> Therefore, opening a dialogue to discuss the parent's and child's  
13 perspective on the child's participation may help children and parents better understand each  
14 other and may help them find ways to interrelate while giving the child more autonomy.  
15  
16  
17  
18  
19  
20  
21  
22  
23  
24  
25  
26  
27  
28  
29  
30  
31  
32

33 A major strength of this study is our paired analysis of qualitative material in which the child  
34 and his/her parent(s) were interviewed separately but simultaneously. This approach provides  
35 important insights into the parents' and child's views regarding participation and how these  
36 views interrelate among various paediatric chronic diseases.<sup>6</sup> Finally, our analytical methods  
37 were designed to optimize both validity and reliability.<sup>21,26</sup> Saturation was reached with  
38 respect to the goals for participation and how the child and his/her parents interrelate,  
39 although some aspects of the parental strategies may not have been fully revealed.  
40  
41  
42  
43  
44  
45  
46  
47  
48  
49  
50

51 Limitations that warrant discussion include the limitations described in our previous report,  
52 such as the generalizability of our results, as we interviewed Caucasian families only. In  
53 addition, the parental interviews focused primarily on how their child viewed his/her  
54  
55  
56  
57  
58  
59  
60

1  
2  
3 participation and not necessarily how the parents defined the participation of the child, as our  
4  
5 research design focused on the child.  
6  
7  
8  
9

10 With respect to the daily life participation of a chronically ill child, healthcare professionals  
11 should initiate a conversation regarding the parents' and child's goals, and the child's  
12 autonomy as early as possible in order to observe and discuss changes over time.<sup>39</sup> Helping  
13 children and parents to communicate with one another about how to adjust to life with a  
14 chronic disease, may be useful, for example using an online peer support group such as *On*  
15 *Track*.<sup>40,41</sup> Also, interventions aimed at supporting children to grow towards autonomy may  
16 be of interest, such as Skills for growing up.<sup>42</sup> For future studies, interventions that teach  
17 healthcare professionals how to start a dialogue with children and parents regarding their  
18 goals and preferences may be beneficial.<sup>39</sup>  
19  
20  
21  
22  
23  
24  
25  
26  
27  
28  
29  
30  
31  
32

### 33 CONCLUSIONS

34 To optimize the child's daily life participation and well-being, understanding the parents'  
35 goals and how parents and children interrelate can allow children, parents, and healthcare  
36 professionals to start a dialogue on mutual goals. It may help children and parents find  
37 effective ways to interrelate, while allowing the child to increase his/her autonomy.  
38  
39  
40  
41  
42  
43  
44  
45  
46  
47  
48  
49  
50  
51  
52  
53  
54  
55  
56  
57  
58  
59  
60

## ACKNOWLEDGEMENTS

The authors would like to acknowledge the contribution of the patients and parents who participated in this study and the involved caregivers. The authors also thank dr. C.F. Barrett for his assistance with English language editing.

## WHAT IS KNOWN:

- An increasing number of children grow up with a chronic disease that majorly impacts their participation in daily life.
- A child's parents play an essential role in driving the child's participation.
- Understanding the parent's as well as the child's perspective helps lay the foundation for establishing mutual goals and a patient-centred approach regarding the child's participation.

## WHAT THIS STUDY ADDS:

- Parents described participation as primarily a means to achieve the child's well-being, whereas children described participation as more of a goal in itself.
- The degree of friction between parents and their child was based on the level of agreement on who takes the lead regarding the child's participation.
- Starting a conversation regarding the child's and parent's goals and decisions may help children and parents find effective ways to interrelate.

**CONTRIBUTORSHIP:** S.L. Nijhof designed the study together with M.C. Kars, L.N. Nijhof, and M.M. Nap-van der Vlist. M.M. Nap-van der Vlist, E.E. Berkelbach van der Sprenkel en L.N. Nijhof collected the data. Initial coding and theoretical thinking was performed by a core team of four researchers (M.M. Nap-van der Vlist, E.E. Berkelbach van der Sprenkel, S.L. Nijhof, and M.C. Kars). Three researchers (L.N. Nijhof, E.M. van de Putte, M.A. Grootenhuis) checked the findings and validated the results. M. van Grotel, J.F. Swart, A. van Royen-Kerkhof, and C.K. van der Ent critically reviewed the data analyses and reviewed the manuscript for important intellectual content. All authors approved the final manuscript as submitted and agree to be accountable for all aspects of the work.

**FUNDING:** The authors have not declared a specific grant for this research from any funding agency in the public, commercial or not-for-profit sectors.

**COMPETING INTERESTS:** No, there are no competing interests.

**EXCLUSIVE LICENSE:** I, the Submitting Author has the right to grant and does grant on behalf of all authors of the Work (as defined in the below author licence), an exclusive licence and/or a non-exclusive licence for contributions from authors who are: i) UK Crown employees; ii) where BMJ has agreed a CC-BY licence shall apply, and/or iii) in accordance with the terms applicable for US Federal Government officers or employees acting as part of their official duties; on a worldwide, perpetual, irrevocable, royalty-free basis to BMJ Publishing Group Ltd ("BMJ") its licensees and where the relevant Journal is co-owned by BMJ to the co-owners of the Journal, to publish the Work in BMJ Paediatrics Open and any other BMJ products and to exploit all rights, as set out in our licence.

The Submitting Author accepts and understands that any supply made under these terms is made by BMJ to the Submitting Author unless you are acting as an employee on behalf of

1  
2  
3 your employer or a postgraduate student of an affiliated institution which is paying any  
4 applicable article publishing charge (“APC”) for Open Access articles. Where the Submitting  
5 Author wishes to make the Work available on an Open Access basis (and intends to pay the  
6 relevant APC), the terms of reuse of such Open Access shall be governed by a Creative  
7 Commons licence – details of these licences and which Creative Commons licence will apply  
8 to this Work are set out in our licence referred to above.  
9

10 I am one author signing on behalf of all co-authors of the Work. The Work has been made in  
11 the course of my employment and I am signing as authorised by my employer. Other than as  
12 permitted in any relevant BMJ Author’s Self Archiving Policies, I confirm this Work has not  
13 been accepted for publication elsewhere, is not being considered for publication elsewhere  
14 and does not duplicate material already published. I confirm all authors consent to publication  
15 of this Work and authorise the granting of this licence.  
16  
17

18 **ETHICS STATEMENT:** The Institutional Review Board determined that this study was  
19 exempt from the Medical Research Involving Human Subjects Act (16-797/C). Informed  
20 consent and/or assent were provided by all participating parents and/or their children.  
21  
22  
23  
24  
25  
26  
27  
28  
29  
30  
31  
32  
33  
34  
35  
36  
37  
38  
39  
40  
41  
42  
43  
44  
45  
46  
47  
48  
49  
50  
51  
52  
53  
54  
55  
56  
57  
58  
59  
60

**REFERENCES**

1. Perrin JM, Bloom SR, Gortmaker SL. The Increase of Childhood Chronic Conditions in the United States. *JAMA*. 2007;297(24):2755. doi:10.1001/jama.297.24.2755
2. WHO | Global recommendations on physical activity for health. *WHO*. Published online 2015.
3. Zan H, Scharff RL. The Heterogeneity in Financial and Time Burden of Caregiving to Children with Chronic Conditions. *Matern Child Health J*. 2015;19(3):615-625. doi:10.1007/s10995-014-1547-3
4. Pinguat M, Teubert D. Academic, physical, and social functioning of children and adolescents with chronic physical illness: a meta-analysis. *J Pediatr Psychol*. 2012;37(4):376-389. doi:10.1093/jpepsy/jsr106
5. Leeman J, Crandell JL, Lee A, Bai J, Sandelowski M, Knafl K. Family Functioning and the Well-Being of Children With Chronic Conditions: A Meta-Analysis. *Res Nurs Health*. 2016;39(4):229-243. doi:10.1002/nur.21725
6. Nap-van der Vlist MM, Kars MC, Berkelbach van der Sprenkel EE, et al. Daily life participation in childhood chronic disease: a qualitative study. *Arch Dis Child*. 2020;105(5):463-469. doi:10.1136/archdischild-2019-318062
7. Martin Ginis KA, Evans MB, Mortenson W Ben, Noreau L. Broadening the Conceptualization of Participation of Persons With Physical Disabilities: A Configurative Review and Recommendations. *Arch Phys Med Rehabil*. 2017;98(2):395-402. doi:10.1016/j.apmr.2016.04.017
8. Westergren T, Berntsen S, Ludvigsen MS, et al. Relationship between physical activity level and psychosocial and socioeconomic factors and issues in children and adolescents with asthma. *JBI Database Syst Rev Implement Reports*. 2017;15(8):2182-2222. doi:10.11124/JBISRIR-2016-003308

- 1  
2  
3 9. Willis C, Girdler S, Thompson M, Rosenberg M, Reid S, Elliott C. Elements  
4  
5 contributing to meaningful participation for children and youth with disabilities: a  
6  
7 scoping review. *Disabil Rehabil.* 2017;39(17):1771-1784.  
8  
9 doi:10.1080/09638288.2016.1207716  
10  
11
- 12 10. Hoefnagels JW, Kars MC, Fischer K, Schutgens R, Schrijvers LH. The Perspectives of  
13  
14 Adolescents and Young Adults on Adherence to Prophylaxis in Hemophilia: A  
15  
16 Qualitative Study. *Patient Prefer Adherence.* 2020;14:163-171.  
17  
18 doi:10.2147/PPA.S232393  
19  
20
- 21 11. Minuchin P. Families and Individual Development : Provocations from the Field of  
22  
23 Family Therapy Author ( s ): Patricia Minuchin Published by : Wiley on behalf of the  
24  
25 Society for Research in Child Development Stable URL :  
26  
27 <http://www.jstor.org/stable/1129720> REFERENCES. *Child Dev.* 1985;56(2):289-302.  
28  
29 doi:10.1002/pen.21025  
30  
31
- 32 12. Schmidt S, Petersen C, Bullinger M. Coping with chronic disease from the perspective  
33  
34 of children and adolescents--a conceptual framework and its implications for  
35  
36 participation. *Child Care Health Dev.* 2003;29(1):63-75. Accessed July 10, 2019.  
37  
38 <http://www.ncbi.nlm.nih.gov/pubmed/12534568>  
39  
40
- 41 13. Kars MC, Grypdonck MHF, de Bock LC, van Delden JJM. The parents' ability to  
42  
43 attend to the "voice of their child" with incurable cancer during the palliative phase.  
44  
45 *Heal Psychol.* 2015;34(4):446-452. doi:10.1037/hea0000166  
46  
47
- 48 14. Wallander JL, Varni JW. Effects of pediatric chronic physical disorders on child and  
49  
50 family adjustment. *J Child Psychol Psychiatry.* 1998;39(1):29-46. Accessed February  
51  
52 14, 2019. <http://www.ncbi.nlm.nih.gov/pubmed/9534085>  
53  
54
- 55 15. Gutman T, Hanson C, Bernays S, et al. Child and Parental Perspectives on  
56  
57 Communication and Decision Making in Pediatric CKD: A Focus Group Study. *Am J*  
58  
59  
60



- 1  
2  
3 *Kidney Dis.* 2018;72(4). doi:10.1053/J.AJKD.2018.05.005  
4  
5  
6 16. Coyne I, Amory A, Kiernan G, Gibson F. Children's participation in shared decision-  
7 making: children, adolescents, parents and healthcare professionals' perspectives and  
8 experiences. *Eur J Oncol Nurs.* 2014;18(3):273-280. doi:10.1016/j.ejon.2014.01.006  
9  
10  
11  
12 17. Peeters MAC, Hilberink SR, van Staa A. The road to independence: lived experiences  
13 of youth with chronic conditions and their parents compared. *J Pediatr Rehabil Med.*  
14 2014;7(1):33-42. doi:10.3233/PRM-140272  
15  
16  
17  
18 18. Fereday J, MacDougall C, Spizzo M, Darbyshire P, Schiller W. "There's nothing  
19 I can't do – I just put my mind to anything and I can do it"; a qualitative analysis  
20 of how children with chronic disease and their parents account for and manage physical  
21 activity. *BMC Pediatr.* 2009;9(1):1. doi:10.1186/1471-2431-9-1  
22  
23  
24  
25 19. Hilberink SR, van Ool M, van der Stege HA, et al. Skills for Growing Up-Epilepsy: An  
26 exploratory mixed methods study into a communication tool to promote autonomy and  
27 empowerment of youth with epilepsy. *Epilepsy Behav.* 2018;86:116-123.  
28 doi:10.1016/J.YEBEH.2018.05.040  
29  
30  
31  
32 20. Dierckx de Casterlé B, Gastmans C, Bryon E, Denier Y. QUAGOL: A guide for  
33 qualitative data analysis. *Int J Nurs Stud.* 2012;49(3):360-371.  
34 doi:10.1016/j.ijnurstu.2011.09.012  
35  
36  
37  
38 21. Creswell J. *Qualitative Inquiry & Research Design: Choosing among Five Approaches*  
39 *(3rd Ed.)*. Thousand Oaks, CA: SAGE.; 2013.  
40  
41  
42  
43 22. Gordijn MS, Suzanne, Cremers EMP, Kaspers GJL, Gemke RBBJ. Fatigue in children:  
44 reliability and validity of the Dutch PedsQL™ Multidimensional Fatigue Scale. *Qual*  
45 *Life Res.* 2011;20(7):1103-1108. doi:10.1007/s11136-010-9836-9  
46  
47  
48  
49 23. Rosier EM, Iadarola MJ, Coghill RC. Reproducibility of pain measurement and pain  
50 perception. *Pain.* 2002;98(1-2):205-216. Accessed May 31, 2019.  
51  
52  
53  
54  
55  
56  
57  
58  
59  
60

- 1  
2  
3 <http://www.ncbi.nlm.nih.gov/pubmed/12098633>  
4  
5  
6 24. Charmaz K. *Constructing Grounded Theory. 2nd Edition*. Sonoma State University,  
7  
8 USA; 2014.  
9  
10 25. Pope C, Ziebland S, Mays N. Qualitative research in health care. Analysing qualitative  
11  
12 data. *BMJ*. 2000;320(7227):114-116. Accessed December 21, 2018.  
13  
14 <http://www.ncbi.nlm.nih.gov/pubmed/10625273>  
15  
16 26. Morse J, Barret M, Mayan M, Olson K, Spiers J. Verification strategies for establishing  
17  
18 reliability and validity in qualitative research. *Int J Qual Meth*. 2002;1(2).  
19  
20 27. VERBI Software. MAXQDA 2018. Published online 2017.  
21  
22 28. Imms C, Granlund M, Wilson PH, Steenbergen B, Rosenbaum PL, Gordon AM.  
23  
24 Participation, both a means and an end: a conceptual analysis of processes and  
25  
26 outcomes in childhood disability. *Dev Med Child Neurol*. 2017;59(1):16-25.  
27  
28 doi:10.1111/dmcn.13237  
29  
30 29. Harden J, Black R, Chin R. Families' experiences of living with pediatric epilepsy: A  
31  
32 qualitative systematic review. *Epilepsy Behav*. 2016;60.  
33  
34 doi:10.1016/J.YEBEH.2016.04.034  
35  
36 30. Bailey PK, Hamilton AJ, Clissold RL, et al. Young adults' perspectives on living with  
37  
38 kidney failure: a systematic review and thematic synthesis of qualitative studies. *BMJ*  
39  
40 *Open*. 2018;8(1):e019926. doi:10.1136/bmjopen-2017-019926  
41  
42 31. Tong A, Jones J, Craig JC, Singh-Grewal D. Children's experiences of living with  
43  
44 juvenile idiopathic arthritis: a thematic synthesis of qualitative studies. 2012;64(9).  
45  
46 doi:10.1002/acr.21695  
47  
48 32. Lambert V, Keogh D. Striving to live a normal life: a review of children and young  
49  
50 people's experience of feeling different when living with a long term condition. *J*  
51  
52 *Pediatr Nurs*. 2015;30(1):63-77. doi:10.1016/j.pedn.2014.09.016  
53  
54  
55  
56  
57  
58  
59  
60

- 1  
2  
3 33. Jamieson N, Fitzgerald D, Singh-Grewal D, Hanson CS, Craig JC, Tong A. Children's  
4 experiences of cystic fibrosis: a systematic review of qualitative studies. *Pediatrics*.  
5  
6 2014;133(6):e1683-97. doi:10.1542/peds.2014-0009  
7  
8  
9  
10 34. Loades ME, James V, Baker L, Jordan A, Sharma A. Parental Experiences of  
11 Adolescent Cancer-Related Fatigue: A Qualitative Study. *J Pediatr Psychol*.  
12  
13 2020;45(10):1093-1102. doi:10.1093/jpepsy/jsaa080  
14  
15  
16 35. Belpame N, Kars MC, Beeckman D, et al. "The AYA Director": A  
17 Synthesizing Concept to Understand Psychosocial Experiences of Adolescents and  
18 Young Adults With Cancer. *Cancer Nurs*. 2016;39(4):292-302.  
19  
20  
21  
22  
23  
24  
25  
26 36. Quirk H, Blake H, Dee B, Glazebrook C. "You can't just jump on a bike and go": a  
27 qualitative study exploring parents' perceptions of physical activity in children with  
28  
29  
30  
31  
32  
33 37. Smith J, Cheater F, Bekker H. Parents' experiences of living with a child with a long-  
34  
35  
36  
37  
38  
39  
40  
41  
42  
43  
44  
45  
46  
47 39. Fahner JC, Beunders AJM, van der Heide A, et al. Interventions Guiding Advance Care  
48  
49  
50  
51  
52  
53  
54  
55  
56  
57  
58  
59  
60

- 1  
2  
3 41. Scholten L, Willemen AM, Grootenhuis MA, Maurice-Stam H, Schuengel C, Last BF.  
4  
5 A cognitive behavioral based group intervention for children with a chronic illness and  
6  
7 their parents: a multicentre randomized controlled trial. *BMC Pediatr.* 2011;11(1):65.  
8  
9 doi:10.1186/1471-2431-11-65  
10  
11  
12 42. Sattoe JNT, Hilberink SR, Peeters MAC, van Staa A. “Skills for growing up”:  
13  
14 Supporting autonomy in young people with kidney disease. *J Ren Care.*  
15  
16 2014;40(2):131-139. doi:10.1002/jorc.12046  
17  
18  
19  
20  
21  
22  
23  
24  
25  
26  
27  
28  
29  
30  
31  
32  
33  
34  
35  
36  
37  
38  
39  
40  
41  
42  
43  
44  
45  
46  
47  
48  
49  
50  
51  
52  
53  
54  
55  
56  
57  
58  
59  
60

Table 1. Summary of the participating children and their parents

| Variable                            | Category                                                           | N  | %    | Median (IQR)     |
|-------------------------------------|--------------------------------------------------------------------|----|------|------------------|
| Parent(s) present at the interview  | Mother                                                             | 22 | 71.0 |                  |
|                                     | Father                                                             | 1  | 3.2  |                  |
|                                     | Both parents                                                       | 8  | 25.8 |                  |
| Parent's age (N=28)*                | <40 years                                                          | 3  | 10.7 | 48.1 (35.4-54.2) |
|                                     | 40-49 years                                                        | 15 | 53.6 |                  |
|                                     | ≥50 years                                                          | 10 | 35.7 |                  |
| Child's sex                         | Female                                                             | 19 | 61.3 |                  |
|                                     | Male                                                               | 12 | 38.7 |                  |
| Child's age                         | 8-11 years                                                         | 12 | 38.7 | 13.1 (8.0-19.1)  |
|                                     | 12-15 years                                                        | 11 | 35.5 |                  |
|                                     | 16-19 years                                                        | 8  | 25.8 |                  |
| Disease/Condition                   | Cystic fibrosis                                                    | 11 | 35.5 |                  |
|                                     | Autoimmune disease                                                 | 11 | 35.5 |                  |
|                                     | Post-cancer treatment                                              | 9  | 29.0 |                  |
| School presence in the past 2 weeks | Total                                                              | 31 | 100  | 100 (0-100)      |
|                                     | ≥90% of the time                                                   | 21 | 77.8 |                  |
|                                     | <90% of the time                                                   | 10 | 32.2 |                  |
| Fatigue**                           | PedsQL general fatigue score (range 0-100)                         | 31 | 100  | 79.2 (25-100)    |
|                                     | Fatigued (score of >1 SD below the reference values on PedsQL MFS) | 12 | 38.7 |                  |
| Pain                                | VAS (range 0-10)                                                   | 31 | 100  | 2.0 (0-9)        |
|                                     | VAS ≥3 over the past week                                          | 11 | 35.5 |                  |

*PedsQL MFS = Paediatric Quality of Life Inventory Multidimensional Fatigue Scale; SD = standard deviation; IQR, interquartile range; VAS = visual analogue scale. \*Only available for 28 parents. \*\*Score 0-100, with lower scores indicating increased fatigue.*

Table 2. Parental strategies regarding their child's participation identified in this study.

| Parental strategy                                   | Description                                                                                                                                                                                                                                                                                                                                                       | Example case                                                                                                                                                                                                                                                                                                                                                                                                                                                                                                        |
|-----------------------------------------------------|-------------------------------------------------------------------------------------------------------------------------------------------------------------------------------------------------------------------------------------------------------------------------------------------------------------------------------------------------------------------|---------------------------------------------------------------------------------------------------------------------------------------------------------------------------------------------------------------------------------------------------------------------------------------------------------------------------------------------------------------------------------------------------------------------------------------------------------------------------------------------------------------------|
| Allowing the child to steer their own participation | Using this strategy, parents attempted to let their child take the lead with as little interference as possible, in order to promote the child's self-sufficiency and autonomy.                                                                                                                                                                                   | <i>"I'm not the one who should forbid it. For example, she tried dancing for six months, and it didn't go well at all. I could have forbidden it, but thought it was better that she found out for herself. Now she really likes free running, even though she can't keep up. But the kids there know that, and she does what she can. She's getting exercise, and she enjoys being part of a group. I can see she is benefitting from it and that it's going well. But do I think it's sensible? No, I don't."</i> |
| Normalising the situation                           | Using this strategy, parents promoted the belief that their child participates just like his/her healthy peers. They also either avoided or tried to change the perspective of others who view their child as limited compared to his/her peers.                                                                                                                  | <i>"She now thinks her situation is normal; maybe she's always in pain, but she doesn't know any better. She just does everything. She says herself that this is her "normal" and that she doesn't know any better than this. It has been like this since she was 5, and she doesn't really know what normal is."</i>                                                                                                                                                                                               |
| Relieving the child from burdens                    | Using this strategy, parents attempted to relieve their child from obligatory activities such as school, appointments, their therapeutic regimen, or the child's responsibility to disclose his/her limitations to others.                                                                                                                                        | <i>"So, we said it was OK to get a dog, but everyone will have to walk the dog every day, especially J, even in bad weather. But that's not strictly true. I often do it in bad weather, because this time of year (fall), her symptoms are often worse."</i>                                                                                                                                                                                                                                                       |
| Facilitating the child                              | Using this strategy, parents adjusted their own life and their family life as much as possible. The resources for achieving this strategy can be personal (e.g. time investment such as a parent who quits his/her job in order to be home for the child), social (e.g. siblings taking over the child's tasks), or financial (e.g. buying additional equipment). | <i>"J. is going to high school next year, and we wonder how he's going to get on. Right now, his bag is packed for him, including snacks; his exercise is arranged, and his bike is ready for him outside the door. His brother does all that for him now, but next year he'll have to do it himself. Other 11-year-old boys can be allowed to bike to the gym on their own, but not J; we have to take him there and pick him up."</i>                                                                             |
| Disclosure                                          | Using this strategy, parents directed the disclosure of their child's disease and limitations to the                                                                                                                                                                                                                                                              | <i>Ex. 1) "She went into a new class, and we said that no one was allowed to ask M. anything about her condition. If they wanted</i>                                                                                                                                                                                                                                                                                                                                                                                |

|                               |                                                                                                                                                                                                                                                                                                                                                                                                                                                                     |                                                                                                                                                                                                                                                                                                                                                                                                                                                                                                                                                                                                                                             |
|-------------------------------|---------------------------------------------------------------------------------------------------------------------------------------------------------------------------------------------------------------------------------------------------------------------------------------------------------------------------------------------------------------------------------------------------------------------------------------------------------------------|---------------------------------------------------------------------------------------------------------------------------------------------------------------------------------------------------------------------------------------------------------------------------------------------------------------------------------------------------------------------------------------------------------------------------------------------------------------------------------------------------------------------------------------------------------------------------------------------------------------------------------------------|
|                               | <p>outside world. In some cases, the parents deliberately chose not to disclose the child's condition, or even temporarily withdrew the child from participating, in order to hide their child's illness or limitations. Other parents chose to disclose the child's disease and limitations on their child's behalf so that the child did not have to do this him/herself and the environment could still be adjusted to accommodate the child's capabilities.</p> | <p><i>to know anything, they were to come to us, and we would explain what happened and that she is now better. M. didn't want to talk about it then, but now she's opened up a bit."</i></p> <p><i>Ex. 2) "Because J. had a group of close friends, it wasn't necessary to communicate it to the entire class. When he went to play with a friend, I just said that J. had a problem with his immune system and that there were some minor hygiene rules to follow, especially when he eats (he has to take pills before he eats anything). We keep it vague, so people don't start Googling and labelling him; he can just be J."</i></p> |
| Redirecting the child         | <p>Using this strategy, parents directly tried to influence the child and what he/she could do either by explicitly telling the child what he/she can and cannot do (e.g. they cannot go on a school trip because it would make them too tired) or by attempting to persuade the child to do or not do certain activities (e.g. to take their medication when away from home or to stop physical exercise when they experience pain).</p>                           | <p><i>"Yes, she didn't need to make that decision. But that's me; I make a lot of decisions on her behalf. I don't know if this is a good thing or not, but both of us are very strict at home; we don't believe much in that 'yes, but' culture. I am perfectly willing to explain why I made a certain decision, but we do what I decide we will do."</i></p>                                                                                                                                                                                                                                                                             |
| Redirecting the outside world | <p>Using this strategy, parents tried to influence their child's environment, for example by asking the child's teacher to give him/her a different seat in class so the child would be less cold, or persuading other parents to invite him/her to a party, even though their child may not be able to participate in all of the activities.</p>                                                                                                                   | <p><i>"When she started at a dance school, we spoke with them beforehand. But within two weeks she was sitting on the side for three-quarters of the hour. So we stopped taking her there. She's now at another dance school; we spoke to the new dance teacher first, and she includes E. in everything. Her teacher even choreographs special dances for her, so she can take part in performances and demonstrations."</i></p>                                                                                                                                                                                                           |

Table 3. Four ways parents and their child interrelate when their goals are either aligned or not aligned, based on a combination of the parents' viewpoint and the child's viewpoint.

|                       |                                                     | The parents' viewpoint                                           |                                                                     |
|-----------------------|-----------------------------------------------------|------------------------------------------------------------------|---------------------------------------------------------------------|
|                       |                                                     | We take the lead regarding the child's participation             | Our child takes the lead regarding his/her own participation        |
| The child's viewpoint | My parents take the lead regarding my participation | Scenario 1: The parents take the lead                            | Scenario 3: Neither the parents nor the child want to take the lead |
|                       | I take the lead regarding my own participation      | Scenario 2: Both the parents and the child want to take the lead | Scenario 4: The child takes the lead                                |

Figure 1. How the child's well-being, participation, and parental strategies interrelate.



Table 4. Illustrative quotes for the four scenarios mentioned in table 3

| Way parents and child interrelate regarding the child's participation | Example case                                                                                                                                                                                                                                                                                                                                                                                                                                                                                                                                                                                                                                                                                                                                                                       |
|-----------------------------------------------------------------------|------------------------------------------------------------------------------------------------------------------------------------------------------------------------------------------------------------------------------------------------------------------------------------------------------------------------------------------------------------------------------------------------------------------------------------------------------------------------------------------------------------------------------------------------------------------------------------------------------------------------------------------------------------------------------------------------------------------------------------------------------------------------------------|
| Scenario 1: Parents take the lead                                     | The mother of an eight-year-old girl with mixed connective tissue disease described: <i>"Yes, she didn't need to make that decision. But that's me; I make a lot of decisions on her behalf. I don't know if this is a good thing or not, but both of us are very strict at home; we don't believe much in that 'yes, but' culture. I am perfectly willing to explain why I made a certain decision, but we do what I decide we will do."</i> The girl herself described it as follows: <i>"I sometimes want to do things, but then mommy says that it's probably better not to, because it will make me too tired."</i>                                                                                                                                                           |
| Scenario 2: Both the parents and the child want to take the lead      | The mother of a twelve-year-old girl with juvenile idiopathic arthritis (JIA) described: <i>"She oversteps her boundaries. She is confrontational; she will become confrontational if she doesn't want to do something or doesn't want to admit something."</i><br>The girl herself described: <i>"Most of the time my mother asks if I took my medication... Sometimes I just say 'yes' even if I didn't take it; it's annoying."</i>                                                                                                                                                                                                                                                                                                                                             |
| Scenario 3: Neither the parents nor their child want to take the lead | One mother of a 15-year-old boy with cystic fibrosis described her desire for her son to become more autonomous in terms of regulating his own therapeutic regimen and inviting friends over; however, when she saw that her son was not going to step up and take the lead and therefore jeopardized his well-being, she took back the lead: <i>"I could tell him I wasn't going to do it and back off. But then I know that it would all go wrong. I just think to myself, 'Oh well, as long as he is at home and I am still able to do it for him.'"</i>                                                                                                                                                                                                                        |
| Scenario 4: The child takes the lead                                  | The mother of a 10-year-old girl with JIA: <i>"I'm not the one who should forbid it. For example, she tried dancing for six months, and it didn't go well at all. I could have forbidden it, but thought it was better that she found out for herself. Now she really likes free running, even though she can't keep up. But the kids there know that, and she does what she can. She's getting exercise, and she enjoys being part of a group. I can see she is benefitting from it and that it's going well. But do I think it's sensible? No, I don't."</i><br>Her daughter: <i>"We often play 'show-jumping', where you put down blocks, lay a hockey stick across them, and then jump over the stick. Even though it isn't very easy, I still join in and play it a lot."</i> |

1  
2  
3  
4  
5  
6  
7  
8  
9  
10  
11  
12  
13  
14  
15  
16  
17  
18  
19  
20  
21  
22  
23  
24  
25  
26  
27  
28  
29  
30  
31  
32  
33  
34  
35  
36  
37  
38  
39  
40  
41  
42  
43  
44  
45  
46  
47  
48  
49  
50  
51  
52  
53  
54  
55  
56  
57  
58  
59  
60

Confidential: For Review Only

1  
2  
3  
4  
5  
6  
7  
8  
9  
10  
11  
12  
13  
14  
15  
16  
17  
18  
19  
20  
21  
22  
23  
24  
25  
26  
27  
28  
29  
30  
31  
32  
33  
34  
35  
36  
37  
38  
39  
40  
41  
42  
43  
44  
45  
46  
47  
48  
49  
50  
51  
52  
53  
54  
55  
56  
57  
58  
59  
60

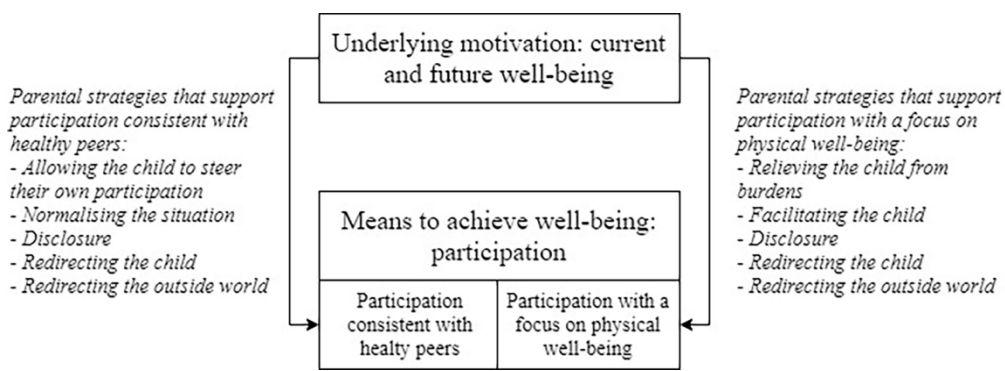

237x85mm (300 x 300 DPI)
